# Supplementary material for: The investigation of fermented food consumption on gastrointestinal symptoms: a cross-sectional study in university students
Source: PeerJ. 2025 Dec 16;13:e20479. doi: 10.7717/peerj.20479 (PMC12716137; doi:10.7717/peerj.20479)
Supplement: Supplemental Information 2 [file peerj-13-20479-s002.xlsx]

## Sheet: fermented foods data
Survey number	Gender	Height (cm)	Bodyweight (kg)	Age (years)	Smoking	Alcohol USE	questionone	questiontwo	questionthree	questionfour	questionfive	questionsix	questionseven	questioneight	questionnine	questionten	questioneleven	questiontwelve	questionthirteen	questionfourteen	questionfifteen	BristolStoolScale	How often do you consume fermented foods? Yogurt	How often do you consume fermented foods? Kefir	How often do you consume fermented foods?Ayran	How often do you consume fermented foods?Cheese	How often do you consume fermented foods?Butter	How often do you consume fermented foods?Pickle	How often do you consume fermented foods?Olive	How often do you consume fermented foods?Sourdough bread	How often do you consume fermented foods?Vinegar	Reflux	Abdominal pain	Diarrhea	Dyspepsia	Constipation	GIS -Total	FREQUENCY YOGURT	FREQUENCY KEFIR	FREQUENCY AYRAN	FREQUENCY CHEESE	FREQUENCY BUTTER	FREQUENCY PICKLES	FREQUENCY OLIVE	FREQUENCY SOURDOUGH BREAD	Bristol Type	FREQUENCY VINEGAR
1	Female	160	70	28	Yes	No	2	2	2	1	1	1	1	1	1	1	2	1	1	1	1	Type 1	5-6 times a week	3-4 times a week	5-6 times a week	3-4 times a week	5-6 times a week	5-6 times a week	5-6 times a week	Every day	Every day	4	4	4	4	3	19	2	3	2	3	2	2	2	1	1	1
2	Female	167	53	22	No	No	5	5	1	5	1	7	5	7	7	7	6	6	6	6	7	Type 2	1-2 times a week	None	None	None	None	1-2 times a week	None	Every day	Every day	6	11	18	26	20	81	4	7	7	7	7	4	7	1	1	1
3	Female	179	69	21	No	No	2	5	6	6	1	3	6	2	2	5	1	1	4	2	1	Type 2	5-6 times a week	Once a month	Once a month	Every day	5-6 times a week	Once a month	Every day	3-4 times a week	Every day	11	9	4	13	10	47	2	6	6	1	2	6	1	3	1	1
4	Female	161	60	20	No	No	2	2	1	2	2	2	2	2	2	2	2	1	2	1	2	Type 1	5-6 times a week	1-2 times a week	1-2 times a week	Every day	Every day	1-2 times a week	1-2 times a week	1-2 times a week	Every day	3	6	4	8	6	27	2	4	4	1	1	4	4	4	1	1
5	Female	167	79	21	Yes	No	2	2	1	1	2	2	2	2	2	1	1	1	1	1	1	Type 4	1-2 times a week	1-2 times a week	1-2 times a week	Every day	None	Every day	Every day	Every day	Every day	3	5	3	8	3	22	4	4	4	1	7	1	1	1	2	1
6	Female	162	68	29	No	No	3	3	2	4	1	2	2	2	1	2	2	1	1	1	2	Type 3	Every day	None	Once a month	Every day	Every day	3-4 times a week	Every day	Every day	Every day	5	8	4	7	5	29	1	7	6	1	1	3	1	1	2	1
7	Female	172	57	20	No	Yes	1	1	1	1	1	2	2	1	1	1	1	1	1	1	2	Type 4	5-6 times a week	Once a month	Once a month	5-6 times a week	None	None	Every day	5-6 times a week	Every day	2	3	3	6	4	18	2	6	6	2	7	7	1	2	2	1
8	Female	162	50	22	Yes	Yes	2	2	1	1	1	6	2	1	3	2	2	3	1	2	3	Type 3	3-4 times a week	Once a month	3-4 times a week	Every day	Every day	5-6 times a week	Every day	3-4 times a week	Every day	3	4	7	12	6	32	3	6	3	1	1	2	1	3	2	1
9	Female	167	58	19	No	No	5	1	1	1	1	1	1	1	1	1	4	1	1	7	7	Type 4	3-4 times a week	None	1-2 times a week	None	5-6 times a week	5-6 times a week	5-6 times a week	3-4 times a week	Every day	2	7	12	4	9	34	3	7	4	7	2	2	2	3	2	1
10	Female	165	58	23	No	No	1	2	1	2	2	2	2	2	1	2	1	1	1	3	2	Type 4	3-4 times a week	Once a month	Once in 15 days	1-2 times a week	1-2 times a week	1-2 times a week	3-4 times a week	3-4 times a week	Every day	3	5	5	7	5	25	3	6	5	4	4	4	3	3	2	1
11	Female	164	56	22	No	No	1	2	1	1	2	1	2	2	2	1	1	1	1	2	1	Type 4	5-6 times a week	Once a month	Once in 15 days	3-4 times a week	1-2 times a week	Once in 15 days	3-4 times a week	3-4 times a week	Every day	3	4	4	7	3	21	2	6	5	3	4	5	3	3	2	1
12	Female	160	61	20	No	Yes	1	2	1	1	3	3	1	4	5	1	1	1	1	1	1	Type 4	Once a month	Once in 15 days	1-2 times a week	Every day	Every day	Every day	Every day	Once a month	Every day	3	5	3	13	3	27	6	5	4	1	1	1	1	6	2	1
13	Female	150	60	20	No	No	2	1	2	1	2	2	1	1	3	1	1	1	4	3	1	Type 4	3-4 times a week	None	Once a month	Every day	Every day	1-2 times a week	1-2 times a week	Once a month	Every day	3	5	5	7	6	26	3	7	6	1	1	4	4	6	2	1
14	Female	162	62	21	Yes	Yes	4	2	1	7	1	7	7	6	6	1	1	1	1	1	1	Type 4	Every day	None	3-4 times a week	Every day	Every day	Every day	Every day	None	Every day	3	12	3	26	3	47	1	7	3	1	1	1	1	7	2	1
15	Female	159	70	20	No	No	2	2	1	1	5	4	1	1	1	4	1	1	1	2	5	Type 6	3-4 times a week	Once a month	Once in 15 days	5-6 times a week	None	Every day	Every day	Every day	Every day	3	8	4	7	10	32	3	6	5	2	7	1	1	1	3	1
16	Female	169	69	18	No	Yes	1	2	1	1	1	7	4	2	2	1	3	2	1	1	2	Type 5	5-6 times a week	Once a month	1-2 times a week	Every day	Every day	3-4 times a week	5-6 times a week	Every day	Every day	3	3	6	15	4	31	2	6	4	1	1	3	2	1	3	1
17	Female	159	55	22	No	Yes	3	2	1	3	3	7	5	4	4	2	2	1	1	4	1	Type 5	Every day	Once in 15 days	3-4 times a week	Every day	Every day	5-6 times a week	Every day	1-2 times a week	Every day	3	9	7	20	4	43	1	5	3	1	1	2	1	4	3	1
18	Female	169	75	22	No	No	6	6	5	6	5	6	3	2	6	6	3	1	5	6	7	Type 2	1-2 times a week	Once a month	Once a month	3-4 times a week	None	Once in 15 days	1-2 times a week	Once in 15 days	5-6 times a week	11	17	10	17	18	73	4	6	6	3	7	5	4	5	1	2
19	Male	188	66	36	Yes	Yes	1	7	7	1	1	1	7	1	1	7	1	1	7	1	7	Type 2	3-4 times a week	None	5-6 times a week	Every day	Every day	Every day	Every day	Once a month	5-6 times a week	14	3	3	10	21	51	3	7	2	1	1	1	1	6	1	2
20	Female	149	60	23	No	No	1	2	2	1	1	2	2	1	2	1	1	1	1	1	1	Type 4	Every day	None	5-6 times a week	3-4 times a week	5-6 times a week	Every day	5-6 times a week	Every day	5-6 times a week	4	3	3	7	3	20	1	7	2	3	2	1	2	1	2	2
21	Female	170	55	22	No	No	2	7	7	1	7	7	5	1	1	1	1	1	1	1	1	Type 4	3-4 times a week	5-6 times a week	3-4 times a week	Every day	3-4 times a week	5-6 times a week	Every day	5-6 times a week	5-6 times a week	14	10	3	14	3	44	3	2	3	1	3	2	1	2	2	2
22	Female	168	55	21	No	Yes	1	2	2	1	2	1	1	2	1	5	4	5	1	1	1	Type 3	Every day	Every day	Every day	5-6 times a week	5-6 times a week	5-6 times a week	5-6 times a week	5-6 times a week	5-6 times a week	4	4	10	5	7	30	1	1	1	2	2	2	2	2	2	2
23	Female	161	59	23	No	Yes	1	1	1	1	7	7	7	3	3	2	7	1	1	1	1	Type 3	Every day	1-2 times a week	5-6 times a week	Every day	3-4 times a week	5-6 times a week	5-6 times a week	5-6 times a week	5-6 times a week	2	9	9	20	4	44	1	4	2	1	3	2	2	2	2	2
24	Male	180	66	23	No	Yes	2	2	1	2	1	2	2	1	1	1	1	2	1	1	1	Type 3	3-4 times a week	Once a month	1-2 times a week	Every day	5-6 times a week	1-2 times a week	5-6 times a week	5-6 times a week	5-6 times a week	3	5	4	6	3	21	3	6	4	1	2	4	2	2	2	2
25	Female	168	54	19	No	Yes	3	3	1	1	5	1	1	1	1	1	1	1	1	1	3	Type 3	1-2 times a week	Once in 15 days	Once in 15 days	3-4 times a week	3-4 times a week	5-6 times a week	Every day	3-4 times a week	5-6 times a week	4	9	3	4	5	25	4	5	5	3	3	2	1	3	2	2
26	Female	174	53	20	No	Yes	1	2	1	5	1	6	5	2	2	1	1	1	1	2	2	Type 3	Every day	1-2 times a week	Once in 15 days	5-6 times a week	Every day	3-4 times a week	Every day	3-4 times a week	5-6 times a week	3	7	4	15	4	33	1	4	5	2	1	3	1	3	2	2
27	Female	164	52	20	Yes	Yes	1	1	1	1	1	1	1	1	1	1	2	1	1	3	2	Type 4	3-4 times a week	1-2 times a week	3-4 times a week	Every day	5-6 times a week	1-2 times a week	Every day	3-4 times a week	5-6 times a week	2	3	6	4	4	19	3	4	3	1	2	4	1	3	2	2
28	Female	165	67	23	No	No	2	2	2	1	1	2	2	1	2	2	1	1	2	2	2	Type 3	Every day	1-2 times a week	Once in 15 days	5-6 times a week	None	Every day	Every day	1-2 times a week	5-6 times a week	4	4	4	7	6	25	1	4	5	2	7	1	1	4	2	2
29	Female	188	74	18	No	No	7	7	2	2	6	5	4	1	4	4	1	1	1	1	3	Type 3	3-4 times a week	5-6 times a week	3-4 times a week	3-4 times a week	1-2 times a week	3-4 times a week	3-4 times a week	1-2 times a week	5-6 times a week	9	15	3	14	8	49	3	2	3	3	4	3	3	4	2	2
30	Female	156	56	23	No	No	4	1	1	1	1	6	5	1	4	1	1	1	1	5	1	Type 4	3-4 times a week	Once a month	1-2 times a week	5-6 times a week	Every day	1-2 times a week	Every day	Once a month	5-6 times a week	2	6	7	16	3	34	3	6	4	2	1	4	1	6	2	2
31	Female	187	50	22	No	No	1	2	1	1	1	1	1	1	1	1	1	1	1	1	1	Type 4	1-2 times a week	None	Every day	Every day	Once in 15 days	Every day	Every day	None	5-6 times a week	3	3	3	4	3	16	4	7	1	1	5	1	1	7	2	2
32	Female	150	46	23	No	No	2	1	1	1	2	2	2	1	2	1	1	1	1	2	2	Type 4	3-4 times a week	None	Once in 15 days	5-6 times a week	3-4 times a week	Once in 15 days	5-6 times a week	None	5-6 times a week	2	5	4	7	4	22	3	7	5	2	3	5	2	7	2	2
33	Female	181	73	20	No	Yes	1	2	1	4	1	4	1	3	1	1	1	1	1	1	1	Type 4	3-4 times a week	None	3-4 times a week	Once in 15 days	Once a month	5-6 times a week	Once a month	None	5-6 times a week	3	6	3	9	3	24	3	7	3	5	6	2	6	7	2	2
34	Female	181	59	30	No	No	2	1	1	1	1	2	1	1	1	1	1	1	1	2	1	Type 5	1-2 times a week	5-6 times a week	1-2 times a week	Every day	5-6 times a week	3-4 times a week	Every day	5-6 times a week	5-6 times a week	2	4	4	5	3	18	4	2	4	1	2	3	1	2	3	2
35	Female	167	63	20	No	No	1	2	1	1	1	4	2	1	4	1	1	1	1	1	1	Type 5	Every day	1-2 times a week	1-2 times a week	5-6 times a week	3-4 times a week	1-2 times a week	None	1-2 times a week	5-6 times a week	3	3	3	11	3	23	1	4	4	2	3	4	7	4	3	2
36	Female	153	65	20	No	No	2	1	2	2	2	2	2	1	1	2	1	1	2	1	1	Type 2	1-2 times a week	Once a month	Once in 15 days	5-6 times a week	3-4 times a week	5-6 times a week	3-4 times a week	5-6 times a week	3-4 times a week	3	6	3	6	5	23	4	6	5	2	3	2	3	2	1	3
37	Female	156	70	26	No	Yes	1	1	1	1	1	1	1	1	1	1	1	1	1	1	1	Type 2	5-6 times a week	Every day	1-2 times a week	Every day	3-4 times a week	Every day	Every day	3-4 times a week	3-4 times a week	2	3	3	4	3	15	2	1	4	1	3	1	1	3	1	3
38	Female	164	62	21	No	No	1	1	1	1	1	1	1	1	1	1	1	1	1	1	1	Type 2	3-4 times a week	Every day	3-4 times a week	3-4 times a week	5-6 times a week	5-6 times a week	5-6 times a week	3-4 times a week	3-4 times a week	2	3	3	4	3	15	3	1	3	3	2	2	2	3	1	3
39	Female	174	84	29	Yes	Yes	6	6	6	6	6	3	6	3	6	2	2	3	3	3	6	Type 2	3-4 times a week	1-2 times a week	1-2 times a week	Every day	1-2 times a week	3-4 times a week	5-6 times a week	3-4 times a week	3-4 times a week	12	18	8	18	11	67	3	4	4	1	4	3	2	3	1	3
40	Female	176	58	24	No	Yes	1	3	3	5	2	1	4	4	3	4	1	1	6	6	6	Type 1	3-4 times a week	Once a month	Once in 15 days	5-6 times a week	5-6 times a week	1-2 times a week	1-2 times a week	1-2 times a week	3-4 times a week	6	8	8	12	16	50	3	6	5	2	2	4	4	4	1	3
41	Female	158	48	21	Yes	Yes	1	1	1	6	2	7	5	5	5	5	1	1	1	2	7	Type 2	Every day	None	Once in 15 days	3-4 times a week	1-2 times a week	Once in 15 days	1-2 times a week	1-2 times a week	3-4 times a week	2	9	4	22	13	50	1	7	5	3	4	5	4	4	1	3
42	Female	169	58	22	No	Yes	1	7	7	2	4	2	2	1	2	1	1	1	1	1	1	Type 2	None	None	Once in 15 days	None	1-2 times a week	Once in 15 days	1-2 times a week	None	3-4 times a week	14	7	3	7	3	34	7	7	5	7	4	5	4	7	1	3
43	Male	190	97	25	Yes	Yes	2	2	2	2	2	2	2	2	2	2	1	2	1	2	2	Type 4	Every day	3-4 times a week	5-6 times a week	5-6 times a week	Every day	5-6 times a week	Every day	Every day	3-4 times a week	4	6	5	8	5	28	1	3	2	2	1	2	1	1	2	3
44	Female	179	68	22	Yes	Yes	1	1	1	1	2	1	1	1	1	1	1	1	1	2	1	Type 4	5-6 times a week	Every day	3-4 times a week	3-4 times a week	5-6 times a week	5-6 times a week	Every day	Every day	3-4 times a week	2	4	4	4	3	17	2	1	3	3	2	2	1	1	2	3
45	Female	165	51	23	No	No	4	3	1	1	6	1	4	4	1	1	6	1	1	1	1	Type 4	Every day	5-6 times a week	Every day	Every day	Every day	3-4 times a week	5-6 times a week	Every day	3-4 times a week	4	11	8	10	3	36	1	2	1	1	1	3	2	1	2	3
46	Male	186	89	20	Yes	Yes	2	1	1	1	1	1	1	1	1	1	1	1	1	1	1	Type 3	5-6 times a week	Once in 15 days	Once in 15 days	Every day	Every day	Every day	Every day	5-6 times a week	3-4 times a week	2	4	3	4	3	16	2	5	5	1	1	1	1	2	2	3
47	Female	150	59	37	No	Yes	2	2	1	2	2	1	2	1	1	1	1	1	1	1	1	Type 4	Every day	1-2 times a week	3-4 times a week	5-6 times a week	5-6 times a week	5-6 times a week	5-6 times a week	5-6 times a week	3-4 times a week	3	6	3	5	3	20	1	4	3	2	2	2	2	2	2	3
48	Female	154	55	23	No	No	1	1	1	1	1	1	1	1	1	1	1	1	1	1	1	Type 4	3-4 times a week	None	1-2 times a week	Every day	Every day	3-4 times a week	Every day	3-4 times a week	3-4 times a week	2	3	3	4	3	15	3	7	4	1	1	3	1	3	2	3
49	Female	160	53	23	No	Yes	1	1	1	5	1	3	3	3	1	1	1	1	1	1	1	Type 4	5-6 times a week	3-4 times a week	1-2 times a week	Every day	3-4 times a week	3-4 times a week	Every day	3-4 times a week	3-4 times a week	2	7	3	10	3	25	2	3	4	1	3	3	1	3	2	3
50	Male	178	94	26	No	Yes	1	1	1	2	1	2	2	1	1	1	1	1	1	1	1	Type 4	1-2 times a week	1-2 times a week	3-4 times a week	5-6 times a week	5-6 times a week	3-4 times a week	5-6 times a week	3-4 times a week	3-4 times a week	2	4	3	6	3	18	4	4	3	2	2	3	2	3	2	3
51	Female	172	71	19	No	No	1	1	1	2	1	1	2	1	1	2	1	1	1	1	2	Type 3	5-6 times a week	1-2 times a week	5-6 times a week	3-4 times a week	3-4 times a week	1-2 times a week	3-4 times a week	3-4 times a week	3-4 times a week	2	4	3	5	5	19	2	4	2	3	3	4	3	3	2	3
52	Male	178	70	24	No	No	1	2	1	2	1	4	4	2	2	2	1	1	2	2	1	Type 3	5-6 times a week	Once in 15 days	1-2 times a week	5-6 times a week	1-2 times a week	1-2 times a week	3-4 times a week	3-4 times a week	3-4 times a week	3	4	4	12	5	28	2	5	4	2	4	4	3	3	2	3
53	Female	154	66	21	No	No	1	1	1	1	1	1	2	1	1	1	1	1	1	1	1	Type 3	3-4 times a week	None	3-4 times a week	3-4 times a week	1-2 times a week	Once in 15 days	3-4 times a week	3-4 times a week	3-4 times a week	2	3	3	5	3	16	3	7	3	3	4	5	3	3	2	3
54	Female	154	52	23	No	No	1	1	1	4	1	4	6	1	3	1	1	1	1	1	4	Type 4	1-2 times a week	None	Once in 15 days	3-4 times a week	3-4 times a week	Once a month	3-4 times a week	3-4 times a week	3-4 times a week	2	6	3	14	6	31	4	7	5	3	3	6	3	3	2	3
55	Female	169	54	20	No	Yes	1	2	1	2	3	3	4	3	3	1	1	1	1	3	5	Type 4	3-4 times a week	None	3-4 times a week	5-6 times a week	3-4 times a week	3-4 times a week	Once in 15 days	3-4 times a week	3-4 times a week	3	6	5	13	7	34	3	7	3	2	3	3	5	3	2	3
56	Female	168	62	20	No	No	2	5	3	2	4	3	1	2	1	1	1	1	2	2	2	Type 3	Every day	3-4 times a week	1-2 times a week	Every day	Every day	1-2 times a week	Every day	1-2 times a week	3-4 times a week	8	8	4	7	5	32	1	3	4	1	1	4	1	4	2	3
57	Female	166	76	18	Yes	Yes	1	1	1	2	1	2	2	1	1	1	1	1	1	1	1	Type 3	3-4 times a week	1-2 times a week	1-2 times a week	1-2 times a week	3-4 times a week	5-6 times a week	1-2 times a week	1-2 times a week	3-4 times a week	2	4	3	6	3	18	3	4	4	4	3	2	4	4	2	3
58	Female	156	49	20	No	No	4	2	2	5	1	3	2	1	1	3	1	1	2	2	4	Type 3	Every day	Once a month	1-2 times a week	Every day	Every day	3-4 times a week	Every day	Once in 15 days	3-4 times a week	4	10	4	7	9	34	1	6	4	1	1	3	1	5	2	3
59	Female	157	48	21	No	No	1	2	1	2	1	2	1	2	2	1	1	1	1	1	1	Type 3	5-6 times a week	1-2 times a week	Once in 15 days	Every day	1-2 times a week	3-4 times a week	Every day	Once in 15 days	3-4 times a week	3	4	3	7	3	20	2	4	5	1	4	3	1	5	2	3
60	Female	180	67	33	No	Yes	1	1	1	1	1	1	3	1	1	1	1	1	1	1	2	Type 3	5-6 times a week	1-2 times a week	Once in 15 days	3-4 times a week	Once in 15 days	Once in 15 days	3-4 times a week	Once in 15 days	3-4 times a week	2	3	3	6	4	18	2	4	5	3	5	5	3	5	2	3
61	Female	170	59	18	No	Yes	1	1	1	1	1	3	3	2	2	1	1	1	1	2	3	Type 3	3-4 times a week	1-2 times a week	1-2 times a week	1-2 times a week	Once in 15 days	1-2 times a week	1-2 times a week	Once in 15 days	3-4 times a week	2	3	4	10	5	24	3	4	4	4	5	4	4	5	2	3
62	Female	167	53	27	Yes	Yes	2	3	1	3	1	2	2	2	2	2	1	1	2	1	1	Type 3	3-4 times a week	Once a month	Once in 15 days	3-4 times a week	3-4 times a week	Once in 15 days	1-2 times a week	Once in 15 days	3-4 times a week	4	6	3	8	5	26	3	6	5	3	3	5	4	5	2	3
63	Female	162	71	21	No	No	5	1	1	1	5	5	1	1	1	1	1	1	1	1	1	Type 4	Every day	Once a month	3-4 times a week	Every day	Once in 15 days	1-2 times a week	Every day	Once a month	3-4 times a week	2	11	3	8	3	27	1	6	3	1	5	4	1	6	2	3
64	Female	153	59	20	No	No	5	5	1	2	2	5	3	3	4	2	5	5	1	5	4	Type 4	1-2 times a week	None	None	Every day	Every day	1-2 times a week	1-2 times a week	Once a month	3-4 times a week	6	9	15	15	7	52	4	7	7	1	1	4	4	6	2	3
65	Female	159	65	19	No	Yes	1	2	2	1	1	2	4	1	4	1	1	1	1	1	3	Type 4	1-2 times a week	None	Once a month	3-4 times a week	3-4 times a week	1-2 times a week	1-2 times a week	Once a month	3-4 times a week	4	3	3	11	5	26	4	7	6	3	3	4	4	6	2	3
66	Female	153	52	24	No	No	1	2	1	2	1	2	1	1	1	1	1	1	1	1	1	Type 4	5-6 times a week	Once in 15 days	1-2 times a week	Every day	5-6 times a week	Once in 15 days	1-2 times a week	Once a month	3-4 times a week	3	4	3	5	3	18	2	5	4	1	2	5	4	6	2	3
67	Female	162	70	24	No	No	6	3	3	3	1	1	1	1	1	1	1	1	1	1	2	Type 4	Every day	1-2 times a week	5-6 times a week	Every day	3-4 times a week	Every day	Every day	None	3-4 times a week	6	10	3	4	4	27	1	4	2	1	3	1	1	7	2	3
68	Female	172	79	22	No	No	2	2	1	3	2	3	4	3	3	5	1	1	5	5	4	Type 3	3-4 times a week	1-2 times a week	1-2 times a week	Every day	Every day	3-4 times a week	Every day	None	3-4 times a week	3	7	7	13	14	44	3	4	4	1	1	3	1	7	2	3
69	Female	169	72	22	Yes	No	1	1	1	1	1	1	1	1	1	3	2	1	1	1	4	Type 3	1-2 times a week	None	1-2 times a week	Every day	5-6 times a week	3-4 times a week	Every day	None	3-4 times a week	2	3	4	4	8	21	4	7	4	1	2	3	1	7	2	3
70	Female	159	58	34	No	No	3	1	1	2	3	3	3	4	4	1	1	2	2	1	1	Type 4	3-4 times a week	5-6 times a week	Once in 15 days	1-2 times a week	3-4 times a week	1-2 times a week	Once a month	None	3-4 times a week	2	8	4	14	4	32	3	2	5	4	3	4	6	7	2	3
71	Female	168	60	21	Yes	Yes	2	2	1	1	1	2	2	1	1	1	1	1	1	1	1	Type 3	None	None	None	None	5-6 times a week	Once in 15 days	None	None	3-4 times a week	3	4	3	6	3	19	7	7	7	7	2	5	7	7	2	3
72	Female	162	55	22	Yes	No	1	1	1	4	1	7	1	7	5	1	1	1	1	1	1	Type 5	5-6 times a week	5-6 times a week	3-4 times a week	3-4 times a week	5-6 times a week	5-6 times a week	3-4 times a week	Every day	3-4 times a week	2	6	3	20	3	34	2	2	3	3	2	2	3	1	3	3
73	Female	163	71	22	No	Yes	1	1	1	1	5	1	6	7	7	1	6	5	1	7	4	Type 5	3-4 times a week	Once a month	3-4 times a week	3-4 times a week	Once a month	1-2 times a week	5-6 times a week	3-4 times a week	3-4 times a week	2	7	18	21	6	54	3	6	3	3	6	4	2	3	3	3
74	Female	169	47	22	Yes	Yes	4	1	1	2	2	1	2	1	2	2	2	2	1	1	1	Type 5	5-6 times a week	3-4 times a week	5-6 times a week	5-6 times a week	3-4 times a week	3-4 times a week	3-4 times a week	3-4 times a week	3-4 times a week	2	8	5	6	4	25	2	3	2	2	3	3	3	3	3	3
75	Male	173	67	21	No	No	3	3	2	3	1	1	1	1	1	1	3	3	3	1	1	Type 6	Every day	None	3-4 times a week	3-4 times a week	Every day	1-2 times a week	3-4 times a week	Once a month	3-4 times a week	5	7	7	4	5	28	1	7	3	3	1	4	3	6	3	3
76	Female	162	55	20	No	No	1	2	1	2	1	2	1	2	1	1	2	1	2	2	2	Type 5	5-6 times a week	None	1-2 times a week	Every day	Every day	3-4 times a week	None	None	3-4 times a week	3	4	5	6	5	23	2	7	4	1	1	3	7	7	3	3
77	Female	160	48	20	No	No	3	1	1	1	3	1	1	1	1	3	3	1	1	1	5	Type 2	1-2 times a week	None	Once in 15 days	Every day	Every day	3-4 times a week	Every day	Every day	1-2 times a week	2	7	5	4	9	27	4	7	5	1	1	3	1	1	1	4
78	Female	151	66	21	Yes	No	1	3	3	1	1	3	3	3	3	1	1	1	1	2	2	Type 1	Every day	None	Once in 15 days	Every day	Every day	3-4 times a week	5-6 times a week	Every day	1-2 times a week	6	3	4	12	4	29	1	7	5	1	1	3	2	1	1	4
79	Female	153	75	24	No	No	2	1	1	2	2	2	1	1	2	2	1	1	1	2	2	Type 2	1-2 times a week	1-2 times a week	1-2 times a week	5-6 times a week	5-6 times a week	3-4 times a week	5-6 times a week	5-6 times a week	1-2 times a week	2	6	4	6	5	23	4	4	4	2	2	3	2	2	1	4
80	Female	174	65	32	Yes	Yes	2	2	2	2	2	2	2	2	2	2	1	1	2	2	2	Type 2	1-2 times a week	1-2 times a week	1-2 times a week	3-4 times a week	Every day	1-2 times a week	1-2 times a week	1-2 times a week	1-2 times a week	4	6	4	8	6	28	4	4	4	3	1	4	4	4	1	4
81	Female	159	49	22	Yes	Yes	1	1	1	1	1	3	1	3	3	3	3	1	2	2	3	Type 2	5-6 times a week	1-2 times a week	5-6 times a week	Every day	3-4 times a week	Once in 15 days	Once a month	1-2 times a week	1-2 times a week	2	3	6	10	8	29	2	4	2	1	3	5	6	4	1	4
82	Female	160	78	22	No	No	4	1	1	1	1	2	2	2	2	7	1	1	7	4	7	Type 2	3-4 times a week	None	Once a month	5-6 times a week	3-4 times a week	3-4 times a week	None	1-2 times a week	1-2 times a week	2	6	6	8	21	43	3	7	6	2	3	3	7	4	1	4
83	Female	161	57	23	No	No	2	2	2	2	2	2	2	3	3	5	1	1	2	1	3	Type 2	5-6 times a week	5-6 times a week	5-6 times a week	Every day	5-6 times a week	Once a month	1-2 times a week	Once a month	1-2 times a week	4	6	3	10	10	33	2	2	2	1	2	6	4	6	1	4
84	Female	155	48	21	Yes	Yes	1	1	1	1	1	1	1	1	1	2	1	1	2	1	1	Type 2	Every day	Once a month	Once in 15 days	Every day	Every day	5-6 times a week	Every day	None	1-2 times a week	2	3	3	4	5	17	1	6	5	1	1	2	1	7	1	4
85	Female	153	63	20	Yes	No	1	1	1	1	1	2	1	2	2	1	2	2	2	2	2	Type 2	5-6 times a week	None	Once a month	Every day	Once a month	Once in 15 days	Every day	None	1-2 times a week	2	3	6	7	5	23	2	7	6	1	6	5	1	7	1	4
86	Female	164	55	21	Yes	Yes	1	1	1	7	1	7	7	3	3	1	6	1	1	1	1	Type 2	1-2 times a week	None	5-6 times a week	5-6 times a week	3-4 times a week	1-2 times a week	5-6 times a week	None	1-2 times a week	2	9	8	20	3	42	4	7	2	2	3	4	2	7	1	4
87	Female	169	57	26	No	No	1	1	1	1	1	1	1	1	1	1	1	1	1	1	1	Type 4	1-2 times a week	1-2 times a week	1-2 times a week	5-6 times a week	3-4 times a week	1-2 times a week	Every day	Every day	1-2 times a week	2	3	3	4	3	15	4	4	4	2	3	4	1	1	2	4
88	Female	165	46	44	No	Yes	4	4	1	1	4	4	5	2	1	1	1	1	3	5	5	Type 4	5-6 times a week	None	5-6 times a week	Every day	1-2 times a week	Once in 15 days	Every day	Every day	1-2 times a week	5	9	7	12	9	42	2	7	2	1	4	5	1	1	2	4
89	Female	170	63	20	Yes	Yes	2	1	1	4	3	3	4	1	2	1	3	3	1	2	1	Type 4	1-2 times a week	1-2 times a week	Every day	1-2 times a week	None	1-2 times a week	None	Every day	1-2 times a week	2	9	8	10	3	32	4	4	1	4	7	4	7	1	2	4
90	Female	160	51	22	Yes	Yes	1	1	1	1	1	1	2	2	2	1	2	1	1	1	1	Type 4	5-6 times a week	None	1-2 times a week	Every day	Every day	3-4 times a week	Every day	5-6 times a week	1-2 times a week	2	3	4	7	3	19	2	7	4	1	1	3	1	2	2	4
91	Female	166	64	37	No	Yes	1	1	1	1	2	1	1	2	1	1	1	1	1	2	2	Type 4	Every day	1-2 times a week	3-4 times a week	Every day	1-2 times a week	3-4 times a week	Every day	5-6 times a week	1-2 times a week	2	4	4	5	4	19	1	4	3	1	4	3	1	2	2	4
92	Female	164	63	20	No	Yes	1	4	1	1	1	4	3	1	3	3	1	1	6	4	4	Type 4	1-2 times a week	None	Once in 15 days	3-4 times a week	5-6 times a week	5-6 times a week	5-6 times a week	5-6 times a week	1-2 times a week	5	3	6	11	13	38	4	7	5	3	2	2	2	2	2	4
93	Female	155	45	22	Yes	No	4	2	1	7	6	7	2	4	4	1	1	1	1	1	2	Type 4	1-2 times a week	None	3-4 times a week	1-2 times a week	5-6 times a week	5-6 times a week	5-6 times a week	5-6 times a week	1-2 times a week	3	17	3	17	4	44	4	7	3	4	2	2	2	2	2	4
94	Female	178	60	20	No	No	5	5	1	3	3	3	1	1	1	1	1	1	1	1	1	Type 3	1-2 times a week	1-2 times a week	1-2 times a week	5-6 times a week	1-2 times a week	5-6 times a week	5-6 times a week	5-6 times a week	1-2 times a week	6	11	3	6	3	29	4	4	4	2	4	2	2	2	2	4
95	Female	188	50	18	No	No	1	1	1	1	1	2	2	1	1	1	1	1	1	1	1	Type 4	3-4 times a week	1-2 times a week	3-4 times a week	5-6 times a week	5-6 times a week	5-6 times a week	3-4 times a week	5-6 times a week	1-2 times a week	2	3	3	6	3	17	3	4	3	2	2	2	3	2	2	4
96	Female	168	60	22	No	Yes	6	6	1	1	1	2	3	1	1	2	1	1	1	1	2	Type 3	5-6 times a week	None	1-2 times a week	Every day	Every day	Once in 15 days	Every day	3-4 times a week	1-2 times a week	7	8	3	7	5	30	2	7	4	1	1	5	1	3	2	4
97	Female	160	59	21	No	No	1	1	2	2	2	1	2	1	1	1	1	1	1	1	1	Type 4	Every day	None	3-4 times a week	5-6 times a week	5-6 times a week	Once a month	Every day	3-4 times a week	1-2 times a week	3	5	3	5	3	19	1	7	3	2	2	6	1	3	2	4
98	Female	155	50	22	No	No	1	1	4	2	3	1	2	2	1	1	1	1	1	1	1	Type 3	Once a month	None	5-6 times a week	3-4 times a week	3-4 times a week	Every day	5-6 times a week	3-4 times a week	1-2 times a week	5	6	3	6	3	23	6	7	2	3	3	1	2	3	2	4
99	Female	153	75	19	No	Yes	1	1	1	1	3	1	1	1	1	1	1	1	1	2	1	Type 4	3-4 times a week	None	5-6 times a week	Every day	5-6 times a week	3-4 times a week	5-6 times a week	3-4 times a week	1-2 times a week	2	5	4	4	3	18	3	7	2	1	2	3	2	3	2	4
100	Female	162	75	20	Yes	Yes	4	1	1	3	3	6	7	7	7	6	6	2	2	5	6	Type 4	3-4 times a week	Once a month	1-2 times a week	Every day	Every day	1-2 times a week	5-6 times a week	3-4 times a week	1-2 times a week	2	10	13	27	14	66	3	6	4	1	1	4	2	3	2	4
101	Female	161	64	24	No	Yes	3	1	1	3	2	5	5	1	7	1	2	1	1	5	1	Type 3	3-4 times a week	None	3-4 times a week	3-4 times a week	Every day	3-4 times a week	3-4 times a week	3-4 times a week	1-2 times a week	2	8	8	18	3	39	3	7	3	3	1	3	3	3	2	4
102	Female	171	75	20	No	No	4	1	1	3	1	3	3	1	3	1	1	1	1	1	1	Type 4	3-4 times a week	None	1-2 times a week	Every day	Every day	Once a month	1-2 times a week	3-4 times a week	1-2 times a week	2	8	3	10	3	26	3	7	4	1	1	6	4	3	2	4
103	Female	168	60	27	No	No	1	1	1	2	1	2	1	2	2	1	2	1	1	1	2	Type 3	1-2 times a week	None	Once a month	1-2 times a week	5-6 times a week	Once in 15 days	Once a month	3-4 times a week	1-2 times a week	2	4	4	7	4	21	4	7	6	4	2	5	6	3	2	4
104	Female	169	53	27	No	No	1	1	1	2	1	2	1	2	2	1	2	1	1	1	2	Type 3	1-2 times a week	None	Once a month	1-2 times a week	5-6 times a week	Once in 15 days	Once a month	3-4 times a week	1-2 times a week	2	4	4	7	4	21	4	7	6	4	2	5	6	3	2	4
105	Female	159	53	30	No	No	1	1	1	1	1	1	1	1	1	1	1	1	1	1	1	Type 4	Once in 15 days	None	None	None	Every day	Every day	Every day	1-2 times a week	1-2 times a week	2	3	3	4	3	15	5	7	7	7	1	1	1	4	2	4
106	Female	168	54	19	No	Yes	1	1	3	1	1	2	5	2	3	3	1	1	4	1	4	Type 3	None	None	None	None	None	3-4 times a week	Every day	1-2 times a week	1-2 times a week	4	3	3	12	11	33	7	7	7	7	7	3	1	4	2	4
107	Female	163	51	19	No	No	2	2	1	4	2	4	4	2	2	1	1	1	1	2	2	Type 4	1-2 times a week	None	3-4 times a week	Every day	3-4 times a week	1-2 times a week	Every day	1-2 times a week	1-2 times a week	3	8	4	12	4	31	4	7	3	1	3	4	1	4	2	4
108	Female	170	72	24	Yes	Yes	1	4	4	1	1	1	1	1	1	1	1	1	1	1	1	Type 4	Every day	1-2 times a week	Every day	Every day	1-2 times a week	None	Every day	1-2 times a week	1-2 times a week	8	3	3	4	3	21	1	4	1	1	4	7	1	4	2	4
109	Female	165	60	20	No	Yes	4	1	1	5	5	7	7	7	5	5	1	2	3	1	4	Type 3	Every day	1-2 times a week	5-6 times a week	1-2 times a week	1-2 times a week	3-4 times a week	5-6 times a week	1-2 times a week	1-2 times a week	2	14	4	26	12	58	1	4	2	4	4	3	2	4	2	4
110	Female	161	55	19	Yes	Yes	1	1	1	3	1	5	1	4	4	1	1	1	3	5	1	Type 3	3-4 times a week	1-2 times a week	1-2 times a week	5-6 times a week	3-4 times a week	1-2 times a week	5-6 times a week	1-2 times a week	1-2 times a week	2	5	7	14	5	33	3	4	4	2	3	4	2	4	2	4
111	Female	155	50	30	Yes	Yes	1	1	1	1	1	2	1	1	2	2	1	1	1	1	2	Type 4	3-4 times a week	1-2 times a week	3-4 times a week	Every day	1-2 times a week	1-2 times a week	5-6 times a week	1-2 times a week	1-2 times a week	2	3	3	6	5	19	3	4	3	1	4	4	2	4	2	4
112	Female	171	53	19	No	Yes	1	1	1	2	2	2	2	1	2	1	1	1	1	1	1	Type 4	3-4 times a week	Once in 15 days	1-2 times a week	1-2 times a week	3-4 times a week	3-4 times a week	3-4 times a week	1-2 times a week	1-2 times a week	2	5	3	7	3	20	3	5	4	4	3	3	3	4	2	4
113	Female	178	55	26	No	No	2	1	1	2	2	2	2	2	2	1	1	1	1	1	2	Type 4	3-4 times a week	1-2 times a week	1-2 times a week	3-4 times a week	3-4 times a week	3-4 times a week	1-2 times a week	1-2 times a week	1-2 times a week	2	6	3	8	4	23	3	4	4	3	3	3	4	4	2	4
114	Female	162	60	21	Yes	Yes	1	1	1	1	1	1	1	1	1	2	1	1	1	1	1	Type 4	1-2 times a week	Once in 15 days	Once in 15 days	Every day	1-2 times a week	1-2 times a week	1-2 times a week	1-2 times a week	1-2 times a week	2	3	3	4	4	16	4	5	5	1	4	4	4	4	2	4
115	Female	167	53	20	No	Yes	1	1	1	2	2	2	1	1	2	2	1	1	1	2	2	Type 4	5-6 times a week	1-2 times a week	1-2 times a week	1-2 times a week	1-2 times a week	1-2 times a week	1-2 times a week	1-2 times a week	1-2 times a week	2	5	4	6	5	22	2	4	4	4	4	4	4	4	2	4
116	Male	160	54	28	No	Yes	1	1	1	1	1	1	1	1	1	1	1	1	1	1	1	Type 4	1-2 times a week	1-2 times a week	1-2 times a week	1-2 times a week	1-2 times a week	1-2 times a week	1-2 times a week	1-2 times a week	1-2 times a week	2	3	3	4	3	15	4	4	4	4	4	4	4	4	2	4
117	Female	171	71	20	No	Yes	6	6	1	2	1	2	5	1	2	6	1	1	2	1	2	Type 3	1-2 times a week	Once a month	Once in 15 days	1-2 times a week	None	Once in 15 days	1-2 times a week	1-2 times a week	1-2 times a week	7	9	3	10	10	39	4	6	5	4	7	5	4	4	2	4
118	Female	160	54	19	No	No	1	1	1	1	1	2	2	1	2	2	1	1	2	1	1	Type 4	3-4 times a week	None	Once in 15 days	1-2 times a week	Every day	1-2 times a week	None	1-2 times a week	1-2 times a week	2	3	3	7	5	20	3	7	5	4	1	4	7	4	2	4
119	Female	178	70	20	No	No	6	2	1	5	5	5	1	1	2	1	4	1	1	1	1	Type 4	1-2 times a week	Once a month	1-2 times a week	Every day	5-6 times a week	3-4 times a week	Every day	Once in 15 days	1-2 times a week	3	16	6	9	3	37	4	6	4	1	2	3	1	5	2	4
120	Female	162	50	20	Yes	No	1	1	1	3	1	3	3	3	7	1	1	1	1	1	7	Type 3	None	None	None	None	None	3-4 times a week	Every day	Once in 15 days	1-2 times a week	2	5	3	16	9	35	7	7	7	7	7	3	1	5	2	4
121	Male	178	74	20	No	No	1	1	1	1	3	2	3	1	1	1	1	1	1	1	1	Type 3	3-4 times a week	Once a month	1-2 times a week	Every day	Every day	Once in 15 days	Every day	Once in 15 days	1-2 times a week	2	5	3	7	3	20	3	6	4	1	1	5	1	5	2	4
122	Female	167	60	22	No	No	1	1	1	2	1	2	1	2	1	1	1	1	1	2	1	Type 3	3-4 times a week	Once a month	3-4 times a week	3-4 times a week	5-6 times a week	3-4 times a week	3-4 times a week	Once in 15 days	1-2 times a week	2	4	4	6	3	19	3	6	3	3	2	3	3	5	2	4
123	Male	192	103	21	No	No	2	2	2	2	2	2	2	2	2	2	1	2	2	2	1	Type 4	3-4 times a week	Once a month	3-4 times a week	3-4 times a week	3-4 times a week	3-4 times a week	3-4 times a week	Once in 15 days	1-2 times a week	4	6	5	8	5	28	3	6	3	3	3	3	3	5	2	4
124	Female	171	50	20	No	Yes	1	3	1	1	1	4	6	1	3	1	1	1	1	1	4	Type 3	3-4 times a week	None	3-4 times a week	3-4 times a week	None	3-4 times a week	3-4 times a week	Once in 15 days	1-2 times a week	4	3	3	14	6	30	3	7	3	3	7	3	3	5	2	4
125	Female	173	55	19	Yes	Yes	4	1	1	7	1	5	2	1	6	6	1	1	1	1	5	Type 3	Every day	None	1-2 times a week	5-6 times a week	Every day	1-2 times a week	3-4 times a week	Once in 15 days	1-2 times a week	2	12	3	14	12	43	1	7	4	2	1	4	3	5	2	4
126	Female	164	59	21	Yes	Yes	3	1	1	2	1	2	3	1	1	1	1	1	1	1	1	Type 4	3-4 times a week	Once in 15 days	None	3-4 times a week	3-4 times a week	Once a month	Once in 15 days	Once in 15 days	1-2 times a week	2	6	3	7	3	21	3	5	7	3	3	6	5	5	2	4
127	Female	162	69	22	No	No	3	1	1	4	6	1	1	1	1	1	1	1	1	1	1	Type 4	Once in 15 days	None	1-2 times a week	None	5-6 times a week	3-4 times a week	Once a month	Once in 15 days	1-2 times a week	2	13	3	4	3	25	5	7	4	7	2	3	6	5	2	4
128	Female	160	53	23	Yes	Yes	4	2	1	2	2	5	5	2	2	2	1	1	2	2	2	Type 3	3-4 times a week	None	Once in 15 days	5-6 times a week	1-2 times a week	1-2 times a week	3-4 times a week	Once a month	1-2 times a week	3	8	4	14	6	35	3	7	5	2	4	4	3	6	2	4
129	Female	171	60	21	No	No	1	4	2	1	1	1	1	1	1	1	1	1	1	1	1	Type 3	1-2 times a week	Once in 15 days	1-2 times a week	3-4 times a week	3-4 times a week	3-4 times a week	Once in 15 days	Once a month	1-2 times a week	6	3	3	4	3	19	4	5	4	3	3	3	5	6	2	4
130	Female	166	65	20	No	No	2	1	2	1	2	1	1	2	2	2	2	2	2	2	2	Type 4	5-6 times a week	None	Once in 15 days	Every day	3-4 times a week	3-4 times a week	Every day	None	1-2 times a week	3	5	6	6	6	26	2	7	5	1	3	3	1	7	2	4
131	Female	162	50	23	No	No	1	1	1	6	2	7	2	2	1	1	1	1	2	2	2	Type 4	Every day	Once a month	5-6 times a week	Every day	Every day	Once in 15 days	Every day	None	1-2 times a week	2	9	4	12	5	32	1	6	2	1	1	5	1	7	2	4
132	Female	168	64	29	Yes	No	1	1	1	1	1	1	1	2	2	1	1	1	1	1	1	Type 3	1-2 times a week	None	Once in 15 days	Every day	Every day	Once a month	Every day	None	1-2 times a week	2	3	3	6	3	17	4	7	5	1	1	6	1	7	2	4
133	Female	160	57	22	No	No	5	4	1	7	1	7	2	4	5	1	1	1	1	1	1	Type 3	5-6 times a week	None	1-2 times a week	5-6 times a week	Every day	Once a month	Every day	None	1-2 times a week	5	13	3	18	3	42	2	7	4	2	1	6	1	7	2	4
134	Female	170	49	21	No	No	1	1	1	1	1	2	1	1	1	1	1	1	1	1	1	Type 4	Every day	None	Every day	Every day	3-4 times a week	3-4 times a week	5-6 times a week	None	1-2 times a week	2	3	3	5	3	16	1	7	1	1	3	3	2	7	2	4
135	Female	170	56	22	No	Yes	5	7	6	5	5	6	5	3	1	7	2	1	6	1	6	Type 3	1-2 times a week	None	1-2 times a week	5-6 times a week	5-6 times a week	1-2 times a week	5-6 times a week	None	1-2 times a week	13	15	4	15	19	66	4	7	4	2	2	4	2	7	2	4
136	Female	161	51	35	No	No	2	2	2	1	1	2	1	1	2	2	1	1	2	2	1	Type 4	5-6 times a week	None	5-6 times a week	5-6 times a week	Every day	3-4 times a week	3-4 times a week	None	1-2 times a week	4	4	4	6	5	23	2	7	2	2	1	3	3	7	2	4
137	Female	174	69	21	No	No	1	1	1	1	1	2	1	1	1	1	2	1	1	1	1	Type 4	1-2 times a week	1-2 times a week	Once in 15 days	1-2 times a week	3-4 times a week	1-2 times a week	3-4 times a week	None	1-2 times a week	2	3	4	5	3	17	4	4	5	4	3	4	3	7	2	4
138	Female	160	71	22	No	No	2	2	1	1	1	3	3	1	2	1	1	1	2	1	1	Type 3	5-6 times a week	None	Once a month	Every day	3-4 times a week	Once a month	3-4 times a week	None	1-2 times a week	3	4	3	9	4	23	2	7	6	1	3	6	3	7	2	4
139	Female	153	55	20	Yes	No	2	4	3	3	1	4	4	3	4	1	1	1	1	3	3	Type 4	1-2 times a week	None	1-2 times a week	Every day	5-6 times a week	1-2 times a week	1-2 times a week	None	1-2 times a week	7	6	5	15	5	38	4	7	4	1	2	4	4	7	2	4
140	Female	167	73	23	No	No	2	1	1	1	2	2	3	3	4	1	2	1	1	1	4	Type 4	1-2 times a week	None	Once a month	1-2 times a week	3-4 times a week	Once in 15 days	1-2 times a week	None	1-2 times a week	2	5	4	12	6	29	4	7	6	4	3	5	4	7	2	4
141	Female	165	60	23	Yes	Yes	1	1	1	4	4	3	5	4	5	6	1	1	5	6	6	Type 3	5-6 times a week	Once in 15 days	None	5-6 times a week	Once in 15 days	3-4 times a week	Once in 15 days	None	1-2 times a week	2	9	8	17	17	53	2	5	7	2	5	3	5	7	2	4
142	Female	152	59	20	No	Yes	4	1	1	1	3	2	7	1	6	5	3	1	1	1	6	Type 3	5-6 times a week	None	None	Every day	3-4 times a week	3-4 times a week	None	None	1-2 times a week	2	8	5	16	12	43	2	7	7	1	3	3	7	7	2	4
143	Female	165	60	21	No	No	3	1	2	4	4	2	4	2	2	4	1	1	2	4	1	Type 4	5-6 times a week	Once in 15 days	1-2 times a week	1-2 times a week	3-4 times a week	1-2 times a week	None	None	1-2 times a week	3	11	6	10	7	37	2	5	4	4	3	4	7	7	2	4
144	Female	167	50	22	No	Yes	5	5	2	2	5	5	6	5	4	1	1	1	1	1	1	Type 4	Once in 15 days	None	1-2 times a week	None	Every day	Once in 15 days	None	None	1-2 times a week	7	12	3	20	3	45	5	7	4	7	1	5	7	7	2	4
145	Female	157	55	20	Yes	Yes	3	2	5	5	6	6	6	6	4	2	5	5	2	5	5	Type 5	1-2 times a week	None	Once a month	1-2 times a week	3-4 times a week	1-2 times a week	1-2 times a week	Every day	1-2 times a week	7	14	15	22	9	67	4	7	6	4	3	4	4	1	3	4
146	Female	178	66	22	No	No	2	2	1	2	1	2	2	1	1	1	2	2	1	2	2	Type 5	Every day	3-4 times a week	3-4 times a week	Every day	None	5-6 times a week	Every day	5-6 times a week	1-2 times a week	3	5	6	6	4	24	1	3	3	1	7	2	1	2	3	4
147	Female	152	56	26	Yes	No	5	5	5	2	4	4	4	4	4	1	3	3	1	3	3	Type 6	3-4 times a week	None	3-4 times a week	5-6 times a week	3-4 times a week	1-2 times a week	5-6 times a week	1-2 times a week	1-2 times a week	10	11	9	16	5	51	3	7	3	2	3	4	2	4	3	4
148	Female	172	56	20	No	No	2	1	1	1	1	2	1	1	1	1	1	1	1	1	1	Type 5	3-4 times a week	1-2 times a week	3-4 times a week	3-4 times a week	5-6 times a week	1-2 times a week	1-2 times a week	1-2 times a week	1-2 times a week	2	4	3	5	3	17	3	4	3	3	2	4	4	4	3	4
149	Female	178	56	28	No	Yes	1	2	4	1	3	3	6	6	6	1	2	3	1	1	3	Type 5	3-4 times a week	None	3-4 times a week	3-4 times a week	3-4 times a week	Once a month	Every day	Once in 15 days	1-2 times a week	6	5	6	21	5	43	3	7	3	3	3	6	1	5	3	4
150	Female	162	48	20	Yes	No	3	3	1	3	2	3	3	1	1	1	2	1	1	3	2	Type 5	3-4 times a week	Once a month	Once a month	Once in 15 days	1-2 times a week	1-2 times a week	Once in 15 days	Once in 15 days	1-2 times a week	4	8	6	8	4	30	3	6	6	5	4	4	5	5	3	4
151	Female	170	55	22	No	No	7	4	4	3	3	3	5	5	6	1	7	7	1	7	3	Type 6	Every day	Once in 15 days	5-6 times a week	Every day	3-4 times a week	1-2 times a week	Every day	Once a month	1-2 times a week	8	13	21	19	5	66	1	5	2	1	3	4	1	6	3	4
152	Female	173	57	22	No	No	4	1	1	3	1	5	4	3	3	6	6	5	4	4	5	Type 5	1-2 times a week	1-2 times a week	3-4 times a week	3-4 times a week	Once a month	5-6 times a week	3-4 times a week	None	1-2 times a week	2	8	15	15	15	55	4	4	3	3	6	2	3	7	3	4
153	Female	169	47	20	No	No	2	1	1	1	1	2	2	1	1	2	1	1	2	1	2	Type 2	3-4 times a week	None	Once a month	Every day	5-6 times a week	1-2 times a week	Every day	3-4 times a week	Once in 15 days	2	4	3	6	6	21	3	7	6	1	2	4	1	3	1	5
154	Female	155	50	20	No	Yes	1	1	1	2	2	2	2	1	1	1	1	1	1	1	1	Type 2	3-4 times a week	Once a month	3-4 times a week	3-4 times a week	3-4 times a week	Once a month	3-4 times a week	3-4 times a week	Once in 15 days	2	5	3	6	3	19	3	6	3	3	3	6	3	3	1	5
155	Female	154	48	20	No	Yes	4	4	3	3	1	2	5	7	7	7	1	1	7	3	7	Type 2	5-6 times a week	None	Once in 15 days	3-4 times a week	3-4 times a week	5-6 times a week	5-6 times a week	Once in 15 days	Once in 15 days	7	8	5	21	21	62	2	7	5	3	3	2	2	5	1	5
156	Female	169	59	21	No	Yes	2	1	1	3	1	5	4	4	2	5	1	1	5	1	1	Type 2	3-4 times a week	None	1-2 times a week	5-6 times a week	5-6 times a week	1-2 times a week	3-4 times a week	Once in 15 days	Once in 15 days	2	6	3	15	11	37	3	7	4	2	2	4	3	5	1	5
157	Female	165	74	19	No	No	2	1	1	2	2	2	1	1	1	2	1	1	2	1	1	Type 1	Every day	None	Once a month	Once a month	1-2 times a week	Once a month	1-2 times a week	Once in 15 days	Once in 15 days	2	6	3	5	5	21	1	7	6	6	4	6	4	5	1	5
158	Female	160	47	22	No	No	6	6	7	5	7	7	4	1	6	7	1	1	7	7	7	Type 2	1-2 times a week	Once a month	1-2 times a week	3-4 times a week	3-4 times a week	Every day	3-4 times a week	None	Once in 15 days	13	18	9	18	21	79	4	6	4	3	3	1	3	7	1	5
159	Female	162	51	19	No	No	2	2	2	2	2	2	2	2	2	2	2	2	2	2	2	Type 2	Every day	None	5-6 times a week	3-4 times a week	5-6 times a week	3-4 times a week	1-2 times a week	None	Once in 15 days	4	6	6	8	6	30	1	7	2	3	2	3	4	7	1	5
160	Female	159	56	18	No	No	4	2	5	1	6	6	6	5	6	5	5	3	3	5	6	Type 2	1-2 times a week	Once a month	Once in 15 days	1-2 times a week	1-2 times a week	1-2 times a week	1-2 times a week	None	Once in 15 days	7	11	13	23	14	68	4	6	5	4	4	4	4	7	1	5
161	Female	163	53	41	Yes	Yes	1	1	1	1	1	1	1	1	1	1	1	1	1	1	1	Type 4	Every day	None	5-6 times a week	Every day	Once in 15 days	3-4 times a week	Every day	5-6 times a week	Once in 15 days	2	3	3	4	3	15	1	7	2	1	5	3	1	2	2	5
162	Female	148	45	22	Yes	Yes	2	1	1	1	2	1	1	1	1	1	1	1	1	1	1	Type 3	1-2 times a week	None	Once in 15 days	Every day	Once in 15 days	3-4 times a week	Every day	5-6 times a week	Once in 15 days	2	5	3	4	3	17	4	7	5	1	5	3	1	2	2	5
163	Female	163	55	22	No	Yes	3	5	5	1	4	5	5	6	6	4	5	5	2	1	1	Type 4	3-4 times a week	1-2 times a week	3-4 times a week	5-6 times a week	None	1-2 times a week	5-6 times a week	5-6 times a week	Once in 15 days	10	8	11	22	7	58	3	4	3	2	7	4	2	2	2	5
164	Female	187	67	22	No	No	2	3	4	2	2	3	2	2	3	1	1	1	2	1	1	Type 4	3-4 times a week	1-2 times a week	3-4 times a week	5-6 times a week	3-4 times a week	Once a month	5-6 times a week	5-6 times a week	Once in 15 days	7	6	3	10	4	30	3	4	3	2	3	6	2	2	2	5
165	Female	162	58	21	No	No	1	2	1	2	1	3	1	2	4	1	1	1	1	2	1	Type 3	5-6 times a week	None	3-4 times a week	5-6 times a week	1-2 times a week	Once in 15 days	Every day	3-4 times a week	Once in 15 days	3	4	4	10	3	24	2	7	3	2	4	5	1	3	2	5
166	Female	161	63	21	No	No	1	1	1	1	1	2	1	1	2	1	1	1	1	1	1	Type 4	3-4 times a week	None	1-2 times a week	3-4 times a week	3-4 times a week	3-4 times a week	3-4 times a week	3-4 times a week	Once in 15 days	2	3	3	6	3	17	3	7	4	3	3	3	3	3	2	5
167	Female	165	54	18	No	Yes	1	1	3	2	1	3	3	1	1	1	1	1	1	1	1	Type 4	1-2 times a week	None	1-2 times a week	3-4 times a week	1-2 times a week	3-4 times a week	3-4 times a week	3-4 times a week	Once in 15 days	4	4	3	8	3	22	4	7	4	3	4	3	3	3	2	5
168	Female	160	48	22	Yes	Yes	1	1	2	1	1	1	1	1	1	1	1	1	1	1	1	Type 4	1-2 times a week	Once a month	Once in 15 days	Every day	Every day	3-4 times a week	Every day	1-2 times a week	Once in 15 days	3	3	3	4	3	16	4	6	5	1	1	3	1	4	2	5
169	Female	155	74	18	Yes	Yes	7	7	1	2	4	4	3	3	3	3	3	3	3	3	3	Type 4	Every day	None	3-4 times a week	Every day	3-4 times a week	Once in 15 days	Every day	1-2 times a week	Once in 15 days	8	13	9	13	9	52	1	7	3	1	3	5	1	4	2	5
170	Female	178	70	21	No	Yes	3	1	1	3	2	3	4	3	3	5	2	1	2	4	4	Type 3	3-4 times a week	1-2 times a week	3-4 times a week	3-4 times a week	1-2 times a week	Once a month	1-2 times a week	1-2 times a week	Once in 15 days	2	8	7	13	11	41	3	4	3	3	4	6	4	4	2	5
171	Female	162	58	21	No	No	2	1	1	5	1	6	5	4	3	7	1	1	1	3	6	Type 3	1-2 times a week	Once a month	None	1-2 times a week	None	3-4 times a week	Once in 15 days	1-2 times a week	Once in 15 days	2	8	5	18	14	47	4	6	7	4	7	3	5	4	2	5
172	Female	160	67	25	No	No	1	1	2	1	1	3	3	2	2	1	1	1	1	3	3	Type 4	3-4 times a week	Once in 15 days	Once in 15 days	3-4 times a week	3-4 times a week	1-2 times a week	Once in 15 days	1-2 times a week	Once in 15 days	3	3	5	10	5	26	3	5	5	3	3	4	5	4	2	5
173	Female	172	75	23	No	No	3	5	1	5	1	1	3	1	3	1	1	1	1	1	1	Type 4	Every day	1-2 times a week	3-4 times a week	Every day	Every day	3-4 times a week	None	1-2 times a week	Once in 15 days	6	9	3	8	3	29	1	4	3	1	1	3	7	4	2	5
174	Female	174	48	21	Yes	Yes	3	5	5	5	1	5	5	7	6	5	2	3	3	5	5	Type 3	Every day	None	Once in 15 days	3-4 times a week	5-6 times a week	1-2 times a week	None	1-2 times a week	Once in 15 days	10	9	10	23	13	65	1	7	5	3	2	4	7	4	2	5
175	Female	181	55	27	Yes	Yes	1	1	1	1	2	1	2	2	3	1	1	1	1	1	1	Type 3	Every day	None	Every day	Every day	Every day	Every day	Every day	Once in 15 days	Once in 15 days	2	4	3	8	3	20	1	7	1	1	1	1	1	5	2	5
176	Female	171	74	23	No	Yes	1	3	1	1	1	1	1	1	1	1	1	1	1	1	1	Type 4	3-4 times a week	None	Once a month	Every day	Every day	Every day	Every day	Once in 15 days	Once in 15 days	4	3	3	4	3	17	3	7	6	1	1	1	1	5	2	5
177	Female	162	72	29	No	No	1	1	1	1	4	1	1	3	5	1	1	1	1	1	1	Type 4	5-6 times a week	None	1-2 times a week	Every day	Every day	5-6 times a week	Every day	Once in 15 days	Once in 15 days	2	6	3	10	3	24	2	7	4	1	1	2	1	5	2	5
178	Female	170	53	28	No	No	1	1	1	4	1	3	3	1	5	2	1	1	6	1	3	Type 3	3-4 times a week	None	Once in 15 days	3-4 times a week	3-4 times a week	3-4 times a week	3-4 times a week	Once in 15 days	Once in 15 days	2	6	3	12	11	34	3	7	5	3	3	3	3	5	2	5
179	Female	168	67	20	No	Yes	1	1	1	2	2	3	3	1	1	1	1	1	1	1	1	Type 4	3-4 times a week	Once in 15 days	3-4 times a week	5-6 times a week	5-6 times a week	None	3-4 times a week	Once in 15 days	Once in 15 days	2	5	3	8	3	21	3	5	3	2	2	7	3	5	2	5
180	Female	160	54	19	Yes	Yes	2	2	2	2	2	2	2	1	2	1	1	1	1	2	2	Type 4	Every day	None	3-4 times a week	Every day	Every day	5-6 times a week	1-2 times a week	Once in 15 days	Once in 15 days	4	6	4	7	4	25	1	7	3	1	1	2	4	5	2	5
181	Female	162	64	22	No	No	2	1	1	2	1	3	1	1	1	2	1	1	1	1	1	Type 3	3-4 times a week	Every day	3-4 times a week	Every day	5-6 times a week	3-4 times a week	1-2 times a week	Once in 15 days	Once in 15 days	2	5	3	6	4	20	3	1	3	1	2	3	4	5	2	5
182	Female	162	60	19	Yes	No	7	4	6	2	1	7	2	1	3	3	1	1	1	1	4	Type 4	5-6 times a week	Once in 15 days	1-2 times a week	1-2 times a week	1-2 times a week	1-2 times a week	1-2 times a week	Once in 15 days	Once in 15 days	10	10	3	13	8	44	2	5	4	4	4	4	4	5	2	5
183	Female	169	67	19	Yes	Yes	2	3	3	1	4	4	4	2	2	3	3	1	1	3	3	Type 4	1-2 times a week	5-6 times a week	1-2 times a week	5-6 times a week	Once in 15 days	Once a month	Once a month	Once in 15 days	Once in 15 days	6	7	7	12	7	39	4	2	4	2	5	6	6	5	2	5
184	Female	174	55	22	No	No	1	1	1	3	3	3	2	1	2	4	3	3	3	1	3	Type 3	Every day	None	Every day	Every day	3-4 times a week	1-2 times a week	Every day	Once a month	Once in 15 days	2	7	7	8	10	34	1	7	1	1	3	4	1	6	2	5
185	Female	171	58	35	Yes	Yes	6	4	4	6	2	7	7	6	6	1	7	7	1	7	7	Type 4	5-6 times a week	1-2 times a week	1-2 times a week	Every day	1-2 times a week	1-2 times a week	Every day	Once a month	Once in 15 days	8	14	21	26	9	78	2	4	4	1	4	4	1	6	2	5
186	Female	174	65	27	No	No	1	1	1	2	1	1	2	2	1	5	1	1	3	2	1	Type 3	3-4 times a week	None	Once in 15 days	Every day	Once a month	1-2 times a week	Every day	Once a month	Once in 15 days	2	4	4	6	9	25	3	7	5	1	6	4	1	6	2	5
187	Male	181	73	21	No	No	4	1	1	1	3	1	1	3	2	1	1	1	1	1	2	Type 3	Once in 15 days	5-6 times a week	Once in 15 days	Every day	Once a month	Once in 15 days	Every day	Once a month	Once in 15 days	2	8	3	7	4	24	5	2	5	1	6	5	1	6	2	5
188	Female	171	55	21	No	No	1	2	1	3	6	3	2	2	1	1	1	2	1	1	1	Type 4	5-6 times a week	Once in 15 days	1-2 times a week	5-6 times a week	1-2 times a week	Once in 15 days	5-6 times a week	Once a month	Once in 15 days	3	10	4	8	3	28	2	5	4	2	4	5	2	6	2	5
189	Female	169	65	22	No	Yes	1	1	3	3	5	7	5	7	7	2	1	1	2	1	4	Type 3	3-4 times a week	None	Once in 15 days	5-6 times a week	5-6 times a week	Once a month	5-6 times a week	Once a month	Once in 15 days	4	9	3	26	8	50	3	7	5	2	2	6	2	6	2	5
190	Female	180	63	20	No	No	2	1	1	2	2	2	2	2	1	1	2	1	1	1	1	Type 4	3-4 times a week	None	3-4 times a week	3-4 times a week	3-4 times a week	1-2 times a week	3-4 times a week	Once a month	Once in 15 days	2	6	4	7	3	22	3	7	3	3	3	4	3	6	2	5
191	Female	168	58	21	No	No	2	5	1	1	4	5	5	1	1	1	1	1	1	1	1	Type 4	Every day	None	Once a month	Every day	1-2 times a week	Once in 15 days	3-4 times a week	Once a month	Once in 15 days	6	7	3	12	3	31	1	7	6	1	4	5	3	6	2	5
192	Female	153	60	19	Yes	No	2	1	1	1	1	2	1	5	5	3	1	1	1	1	1	Type 3	3-4 times a week	Once in 15 days	3-4 times a week	3-4 times a week	1-2 times a week	Once in 15 days	3-4 times a week	Once a month	Once in 15 days	2	4	3	13	5	27	3	5	3	3	4	5	3	6	2	5
193	Male	166	51	19	No	No	2	3	2	2	1	2	2	2	2	3	3	2	2	2	3	Type 3	5-6 times a week	None	Once in 15 days	3-4 times a week	3-4 times a week	1-2 times a week	1-2 times a week	Once a month	Once in 15 days	5	5	7	8	8	33	2	7	5	3	3	4	4	6	2	5
194	Female	159	48	20	No	Yes	3	4	2	4	3	3	1	1	1	1	1	1	1	1	1	Type 4	3-4 times a week	Once in 15 days	5-6 times a week	3-4 times a week	1-2 times a week	Once in 15 days	1-2 times a week	Once a month	Once in 15 days	6	10	3	6	3	28	3	5	2	3	4	5	4	6	2	5
195	Female	160	70	19	No	No	6	5	1	1	3	1	7	3	3	6	1	1	6	5	6	Type 4	3-4 times a week	None	Once a month	Every day	1-2 times a week	3-4 times a week	Once a month	Once a month	Once in 15 days	6	10	7	14	18	55	3	7	6	1	4	3	6	6	2	5
196	Male	167	60	20	Yes	Yes	2	2	2	2	2	2	2	2	2	1	1	1	1	1	1	Type 4	1-2 times a week	None	1-2 times a week	Once in 15 days	Once in 15 days	Once in 15 days	Once a month	Once a month	Once in 15 days	4	6	3	8	3	24	4	7	4	5	5	5	6	6	2	5
197	Female	148	59	21	No	Yes	2	3	1	1	1	1	1	2	1	1	1	1	1	2	1	Type 4	Once in 15 days	Once a month	Once a month	Once in 15 days	Once in 15 days	Once a month	Once a month	Once a month	Once in 15 days	4	4	4	5	3	20	5	6	6	5	5	6	6	6	2	5
198	Female	166	56	20	No	Yes	1	2	2	3	3	7	1	1	1	1	4	1	1	5	1	Type 3	3-4 times a week	None	Once in 15 days	1-2 times a week	1-2 times a week	Once a month	None	Once a month	Once in 15 days	4	7	10	10	3	34	3	7	5	4	4	6	7	6	2	5
199	Female	162	80	23	No	No	2	1	1	2	1	4	2	1	2	1	1	1	2	1	3	Type 3	3-4 times a week	Once in 15 days	1-2 times a week	5-6 times a week	1-2 times a week	Every day	Every day	None	Once in 15 days	2	5	3	9	6	25	3	5	4	2	4	1	1	7	2	5
200	Female	181	59	19	No	Yes	4	1	7	1	7	7	7	3	3	1	1	1	1	7	5	Type 4	3-4 times a week	None	1-2 times a week	Every day	5-6 times a week	3-4 times a week	Every day	None	Once in 15 days	8	12	9	20	7	56	3	7	4	1	2	3	1	7	2	5
201	Female	156	60	23	Yes	Yes	3	1	1	2	1	2	2	1	2	1	2	1	1	1	1	Type 4	Once in 15 days	Once in 15 days	1-2 times a week	Every day	3-4 times a week	3-4 times a week	Every day	None	Once in 15 days	2	6	4	7	3	22	5	5	4	1	3	3	1	7	2	5
202	Female	155	48	20	Yes	No	7	6	6	6	6	6	7	5	4	3	1	1	2	7	4	Type 3	3-4 times a week	None	5-6 times a week	5-6 times a week	3-4 times a week	1-2 times a week	Every day	None	Once in 15 days	12	19	9	22	9	71	3	7	2	2	3	4	1	7	2	5
203	Female	160	70	21	No	No	1	1	1	2	1	1	1	1	1	1	1	1	1	2	1	Type 4	Every day	Once in 15 days	Once in 15 days	Every day	None	1-2 times a week	Every day	None	Once in 15 days	2	4	4	4	3	17	1	5	5	1	7	4	1	7	2	5
204	Female	162	50	20	No	No	1	3	2	1	1	2	3	1	2	1	1	1	1	1	1	Type 4	3-4 times a week	None	Once in 15 days	1-2 times a week	3-4 times a week	Once a month	Every day	None	Once in 15 days	5	3	3	8	3	22	3	7	5	4	3	6	1	7	2	5
205	Female	175	70	20	No	Yes	1	1	1	1	1	1	1	1	1	1	1	1	1	1	1	Type 4	3-4 times a week	None	1-2 times a week	Every day	5-6 times a week	1-2 times a week	5-6 times a week	None	Once in 15 days	2	3	3	4	3	15	3	7	4	1	2	4	2	7	2	5
206	Female	166	52	40	Yes	No	1	1	1	1	1	3	3	1	3	3	1	1	1	1	1	Type 3	Every day	Once a month	3-4 times a week	Once in 15 days	Once in 15 days	5-6 times a week	3-4 times a week	None	Once in 15 days	2	3	3	10	5	23	1	6	3	5	5	2	3	7	2	5
207	Male	183	81	19	No	Yes	1	1	1	2	2	2	2	2	2	1	1	1	1	1	1	Type 4	1-2 times a week	None	3-4 times a week	1-2 times a week	1-2 times a week	1-2 times a week	3-4 times a week	None	Once in 15 days	2	5	3	8	3	21	4	7	3	4	4	4	3	7	2	5
208	Female	153	48	21	Yes	Yes	3	3	3	3	1	3	3	1	2	1	1	1	1	2	2	Type 4	1-2 times a week	None	1-2 times a week	1-2 times a week	1-2 times a week	1-2 times a week	3-4 times a week	None	Once in 15 days	6	7	4	9	4	30	4	7	4	4	4	4	3	7	2	5
209	Female	167	60	19	No	Yes	1	1	3	2	2	2	2	1	1	1	1	2	1	2	4	Type 4	1-2 times a week	Once a month	Once a month	5-6 times a week	5-6 times a week	Once in 15 days	3-4 times a week	None	Once in 15 days	4	5	5	6	6	26	4	6	6	2	2	5	3	7	2	5
210	Female	170	56	20	No	Yes	3	1	1	5	1	5	4	3	1	1	1	1	1	4	1	Type 3	3-4 times a week	Once a month	1-2 times a week	1-2 times a week	3-4 times a week	Once in 15 days	3-4 times a week	None	Once in 15 days	2	9	6	13	3	33	3	6	4	4	3	5	3	7	2	5
211	Female	162	65	26	Yes	Yes	4	5	1	5	1	5	3	2	1	1	4	4	1	4	1	Type 4	3-4 times a week	None	1-2 times a week	3-4 times a week	Once in 15 days	1-2 times a week	1-2 times a week	None	Once in 15 days	6	10	12	11	3	42	3	7	4	3	5	4	4	7	2	5
212	Female	155	69	22	Yes	Yes	4	4	1	2	3	7	5	2	2	2	3	1	1	1	1	Type 4	Once a month	None	1-2 times a week	Once in 15 days	None	1-2 times a week	1-2 times a week	None	Once in 15 days	5	9	5	16	4	39	6	7	4	5	7	4	4	7	2	5
213	Female	165	61	21	No	No	1	1	1	1	1	1	1	1	1	1	1	1	1	1	1	Type 3	Once in 15 days	None	3-4 times a week	1-2 times a week	5-6 times a week	Once in 15 days	1-2 times a week	None	Once in 15 days	2	3	3	4	3	15	5	7	3	4	2	5	4	7	2	5
214	Female	162	70	21	No	Yes	3	6	1	2	1	3	1	1	1	1	1	1	1	1	7	Type 3	3-4 times a week	Once in 15 days	1-2 times a week	3-4 times a week	Once in 15 days	Once in 15 days	1-2 times a week	None	Once in 15 days	7	6	3	6	9	31	3	5	4	3	5	5	4	7	2	5
215	Female	178	64	23	Yes	No	2	1	1	2	1	3	4	1	1	1	1	1	2	1	2	Type 3	3-4 times a week	Once in 15 days	Once in 15 days	1-2 times a week	Every day	Once a month	Once in 15 days	None	Once in 15 days	2	5	3	9	5	24	3	5	5	4	1	6	5	7	2	5
216	Female	172	53	21	No	No	1	1	1	1	1	1	3	1	1	6	1	1	1	1	1	Type 3	5-6 times a week	None	Once a month	Once in 15 days	None	None	Once in 15 days	None	Once in 15 days	2	3	3	6	8	22	2	7	6	5	7	7	5	7	2	5
217	Female	171	53	21	Yes	Yes	1	1	1	1	1	2	1	1	2	2	1	1	4	1	2	Type 3	1-2 times a week	1-2 times a week	Once in 15 days	3-4 times a week	None	1-2 times a week	Once a month	None	Once in 15 days	2	3	3	6	8	22	4	4	5	3	7	4	6	7	2	5
218	Female	177	55	20	Yes	Yes	2	2	1	2	2	2	2	2	2	1	1	1	1	2	2	Type 3	1-2 times a week	None	Once a month	3-4 times a week	3-4 times a week	1-2 times a week	None	None	Once in 15 days	3	6	4	8	4	25	4	7	6	3	3	4	7	7	2	5
219	Female	181	59	22	Yes	No	4	6	6	1	1	5	5	3	3	1	1	1	1	6	1	Type 3	Every day	None	Once in 15 days	1-2 times a week	Every day	None	None	None	Once in 15 days	12	6	8	16	3	45	1	7	5	4	1	7	7	7	2	5
220	Female	153	51	23	No	No	2	2	2	1	1	1	2	2	2	1	1	1	1	1	1	Type 5	3-4 times a week	None	3-4 times a week	Every day	1-2 times a week	Every day	Every day	5-6 times a week	Once in 15 days	4	4	3	7	3	21	3	7	3	1	4	1	1	2	3	5
221	Female	160	56	19	No	No	1	2	1	1	1	2	1	1	1	1	1	1	1	1	1	Type 5	3-4 times a week	Once a month	1-2 times a week	Every day	3-4 times a week	1-2 times a week	Every day	1-2 times a week	Once in 15 days	3	3	3	5	3	17	3	6	4	1	3	4	1	4	3	5
222	Female	187	60	20	Yes	Yes	1	1	1	3	1	3	1	1	1	1	1	1	1	1	1	Type 5	3-4 times a week	None	1-2 times a week	Once a month	None	None	3-4 times a week	None	Once in 15 days	2	5	3	6	3	19	3	7	4	6	7	7	3	7	3	5
223	Female	163	65	23	Yes	No	2	1	1	1	1	2	1	1	2	1	1	1	1	1	1	Type 5	1-2 times a week	None	Once in 15 days	3-4 times a week	Once in 15 days	None	1-2 times a week	None	Once in 15 days	2	4	3	6	3	18	4	7	5	3	5	7	4	7	3	5
224	Female	162	55	20	No	No	2	1	3	2	2	2	2	1	1	1	2	2	1	3	2	Type 2	Every day	None	Once in 15 days	1-2 times a week	3-4 times a week	3-4 times a week	3-4 times a week	Every day	Once a month	4	6	7	6	4	27	1	7	5	4	3	3	3	1	1	6
225	Female	166	55	22	Yes	Yes	2	1	1	5	1	5	5	5	5	5	1	1	5	4	6	Type 2	3-4 times a week	None	Once in 15 days	3-4 times a week	5-6 times a week	5-6 times a week	Once in 15 days	5-6 times a week	Once a month	2	8	6	20	16	52	3	7	5	3	2	2	5	2	1	6
226	Female	162	67	22	No	No	3	5	1	3	1	3	4	2	2	1	3	3	3	4	4	Type 2	1-2 times a week	Once in 15 days	Once in 15 days	3-4 times a week	1-2 times a week	1-2 times a week	1-2 times a week	Once in 15 days	Once a month	6	7	10	11	8	42	4	5	5	3	4	4	4	5	1	6
227	Female	149	78	23	No	Yes	6	6	6	5	5	5	6	6	5	7	1	1	7	1	7	Type 1	1-2 times a week	Once a month	1-2 times a week	1-2 times a week	None	Once a month	1-2 times a week	Once a month	Once a month	12	16	3	22	21	74	4	6	4	4	7	6	4	6	1	6
228	Male	178	68	25	No	No	2	2	1	2	1	2	2	2	2	1	1	1	1	1	1	Type 2	5-6 times a week	Once in 15 days	3-4 times a week	5-6 times a week	3-4 times a week	Once in 15 days	5-6 times a week	None	Once a month	3	5	3	8	3	22	2	5	3	2	3	5	2	7	1	6
229	Female	178	67	20	No	Yes	2	2	2	3	3	4	4	1	1	1	1	1	1	2	2	Type 2	1-2 times a week	3-4 times a week	Once in 15 days	Every day	1-2 times a week	Once in 15 days	None	None	Once a month	4	8	4	10	4	30	4	3	5	1	4	5	7	7	1	6
230	Female	169	65	25	No	No	5	6	7	5	7	5	5	4	5	4	2	3	3	3	7	Type 2	Once a month	None	None	None	Once a month	Once a month	None	None	Once a month	13	17	8	19	14	71	6	7	7	7	6	6	7	7	1	6
231	Female	163	70	23	No	Yes	1	1	1	6	2	4	4	2	3	4	1	1	1	1	4	Type 1	3-4 times a week	Once a month	Once a month	3-4 times a week	3-4 times a week	None	None	None	Once a month	2	9	3	13	9	36	3	6	6	3	3	7	7	7	1	6
232	Female	163	58	22	No	No	2	3	3	2	1	2	3	2	1	3	1	1	2	1	3	Type 3	3-4 times a week	None	1-2 times a week	Every day	1-2 times a week	5-6 times a week	Every day	Every day	Once a month	6	5	3	8	8	30	3	7	4	1	4	2	1	1	2	6
233	Female	157	62	21	No	No	2	1	1	1	2	1	2	1	1	1	1	1	1	1	1	Type 4	Every day	3-4 times a week	1-2 times a week	Every day	3-4 times a week	Once a month	Every day	Every day	Once a month	2	5	3	5	3	18	1	3	4	1	3	6	1	1	2	6
234	Female	171	72	35	Yes	No	3	5	1	1	1	4	4	4	4	1	1	1	1	1	1	Type 4	1-2 times a week	None	Once in 15 days	Every day	None	Once a month	Every day	Every day	Once a month	6	5	3	16	3	33	4	7	5	1	7	6	1	1	2	6
235	Female	160	60	22	Yes	Yes	1	3	2	2	6	6	6	1	1	1	1	1	1	1	1	Type 4	1-2 times a week	None	Once a month	1-2 times a week	1-2 times a week	Once in 15 days	1-2 times a week	Every day	Once a month	5	9	3	14	3	34	4	7	6	4	4	5	4	1	2	6
236	Female	155	45	20	No	No	3	1	3	2	2	3	1	2	1	1	1	1	2	2	3	Type 3	1-2 times a week	None	Once a month	5-6 times a week	Once in 15 days	1-2 times a week	5-6 times a week	5-6 times a week	Once a month	4	7	4	7	6	28	4	7	6	2	5	4	2	2	2	6
237	Female	160	61	20	No	No	1	1	3	6	1	3	3	6	6	1	1	1	1	1	1	Type 4	5-6 times a week	None	Once a month	Every day	3-4 times a week	Once a month	5-6 times a week	5-6 times a week	Once a month	4	8	3	18	3	36	2	7	6	1	3	6	2	2	2	6
238	Female	157	46	20	No	Yes	1	1	1	1	1	4	1	2	1	1	1	1	1	1	1	Type 4	3-4 times a week	None	Once in 15 days	Every day	None	Once a month	5-6 times a week	5-6 times a week	Once a month	2	3	3	8	3	19	3	7	5	1	7	6	2	2	2	6
239	Female	179	59	21	Yes	No	1	1	2	1	1	2	2	1	1	1	1	1	1	1	1	Type 4	1-2 times a week	None	1-2 times a week	1-2 times a week	Once in 15 days	None	1-2 times a week	5-6 times a week	Once a month	3	3	3	6	3	18	4	7	4	4	5	7	4	2	2	6
240	Female	170	60	23	No	Yes	4	2	2	1	5	5	3	1	5	5	5	1	6	6	7	Type 3	3-4 times a week	None	1-2 times a week	Every day	Every day	None	None	5-6 times a week	Once a month	4	10	12	14	18	58	3	7	4	1	1	7	7	2	2	6
241	Female	169	54	18	No	No	4	3	1	7	2	7	6	6	6	1	1	1	1	1	1	Type 4	5-6 times a week	None	Once in 15 days	3-4 times a week	Every day	1-2 times a week	Every day	3-4 times a week	Once a month	4	13	3	25	3	48	2	7	5	3	1	4	1	3	2	6
242	Male	183	75	23	No	No	1	7	7	1	1	7	7	7	7	1	7	1	1	7	7	Type 4	1-2 times a week	Once a month	3-4 times a week	3-4 times a week	3-4 times a week	Once in 15 days	3-4 times a week	3-4 times a week	Once a month	14	3	15	28	9	69	4	6	3	3	3	5	3	3	2	6
243	Female	159	68	20	No	Yes	1	1	1	1	1	4	1	3	5	1	1	1	1	4	2	Type 4	Every day	Once a month	1-2 times a week	Every day	1-2 times a week	Once in 15 days	3-4 times a week	3-4 times a week	Once a month	2	3	6	13	4	28	1	6	4	1	4	5	3	3	2	6
244	Female	169	48	20	No	Yes	1	1	1	1	1	1	1	2	2	1	1	1	1	1	1	Type 3	1-2 times a week	1-2 times a week	1-2 times a week	1-2 times a week	1-2 times a week	None	3-4 times a week	3-4 times a week	Once a month	2	3	3	6	3	17	4	4	4	4	4	7	3	3	2	6
245	Female	169	60	22	No	No	1	2	1	1	1	1	1	1	1	1	1	1	1	1	1	Type 4	Every day	Once a month	1-2 times a week	Every day	5-6 times a week	5-6 times a week	Once in 15 days	3-4 times a week	Once a month	3	3	3	4	3	16	1	6	4	1	2	2	5	3	2	6
246	Female	175	58	20	Yes	Yes	5	7	7	7	7	6	6	5	5	1	1	1	1	3	4	Type 3	5-6 times a week	1-2 times a week	3-4 times a week	1-2 times a week	Once a month	Once a month	1-2 times a week	1-2 times a week	Once a month	14	19	5	22	6	66	2	4	3	4	6	6	4	4	2	6
247	Female	183	71	23	Yes	Yes	2	1	1	2	1	2	2	1	1	1	1	1	1	1	1	Type 4	Every day	Once a month	Once in 15 days	5-6 times a week	1-2 times a week	Once a month	Once in 15 days	1-2 times a week	Once a month	2	5	3	6	3	19	1	6	5	2	4	6	5	4	2	6
248	Female	159	55	19	No	Yes	5	5	1	1	2	2	2	2	2	5	4	4	4	2	2	Type 3	5-6 times a week	Once a month	3-4 times a week	5-6 times a week	Once a month	Once a month	5-6 times a week	Once in 15 days	Once a month	6	8	10	8	11	43	2	6	3	2	6	6	2	5	2	6
249	Male	188	75	20	No	Yes	1	1	1	1	1	1	1	1	1	1	1	1	1	1	1	Type 4	3-4 times a week	Once in 15 days	3-4 times a week	3-4 times a week	Once a month	5-6 times a week	3-4 times a week	Once in 15 days	Once a month	2	3	3	4	3	15	3	5	3	3	6	2	3	5	2	6
250	Female	155	58	22	No	No	1	2	1	1	2	2	2	3	3	4	1	1	2	1	2	Type 3	Once in 15 days	Once a month	Once a month	Once in 15 days	Once in 15 days	3-4 times a week	3-4 times a week	Once in 15 days	Once a month	3	4	3	10	8	28	5	6	6	5	5	3	3	5	2	6
251	Female	166	54	22	No	No	2	1	1	1	1	1	1	1	1	1	1	1	1	1	1	Type 3	5-6 times a week	None	3-4 times a week	5-6 times a week	3-4 times a week	Once a month	3-4 times a week	Once in 15 days	Once a month	2	4	3	4	3	16	2	7	3	2	3	6	3	5	2	6
252	Male	185	78	29	No	Yes	3	3	1	1	1	1	2	2	1	1	1	1	1	1	1	Type 4	5-6 times a week	Once a month	3-4 times a week	5-6 times a week	3-4 times a week	Once a month	1-2 times a week	Once in 15 days	Once a month	4	5	3	6	3	21	2	6	3	2	3	6	4	5	2	6
253	Female	167	58	21	Yes	Yes	3	4	2	2	3	3	3	2	2	2	2	2	2	2	2	Type 3	Every day	None	1-2 times a week	Every day	Every day	5-6 times a week	Once in 15 days	Once in 15 days	Once a month	6	8	6	10	6	36	1	7	4	1	1	2	5	5	2	6
254	Female	162	71	23	No	No	6	6	6	6	6	6	6	1	2	5	1	1	4	2	3	Type 4	Every day	None	Every day	Every day	1-2 times a week	5-6 times a week	Every day	Once a month	Once a month	12	18	4	15	12	61	1	7	1	1	4	2	1	6	2	6
255	Female	167	60	18	No	Yes	4	1	1	1	2	2	1	1	1	1	1	1	1	1	1	Type 4	1-2 times a week	None	Once in 15 days	Every day	3-4 times a week	3-4 times a week	Every day	Once a month	Once a month	2	7	3	5	3	20	4	7	5	1	3	3	1	6	2	6
256	Female	159	52	20	No	No	1	1	1	1	1	3	1	3	4	1	1	1	1	4	1	Type 3	Once in 15 days	None	Once a month	Every day	Every day	Once a month	Every day	Once a month	Once a month	2	3	6	11	3	25	5	7	6	1	1	6	1	6	2	6
257	Female	169	58	20	No	No	4	6	6	6	3	6	6	4	4	3	3	3	3	3	7	Type 4	Every day	None	Every day	Every day	3-4 times a week	3-4 times a week	5-6 times a week	Once a month	Once a month	12	13	9	20	13	67	1	7	1	1	3	3	2	6	2	6
258	Female	169	82	22	No	Yes	5	1	1	1	5	1	2	1	1	1	1	1	1	1	1	Type 4	Every day	1-2 times a week	Once in 15 days	Every day	1-2 times a week	1-2 times a week	5-6 times a week	Once a month	Once a month	2	11	3	5	3	24	1	4	5	1	4	4	2	6	2	6
259	Female	160	54	32	No	No	1	1	1	1	1	2	2	1	1	1	1	1	1	1	2	Type 3	3-4 times a week	None	1-2 times a week	3-4 times a week	Once a month	Once a month	5-6 times a week	Once a month	Once a month	2	3	3	6	4	18	3	7	4	3	6	6	2	6	2	6
260	Female	158	49	21	No	No	4	4	1	2	2	7	7	2	1	1	2	1	2	3	2	Type 4	3-4 times a week	None	3-4 times a week	5-6 times a week	3-4 times a week	Once in 15 days	3-4 times a week	Once a month	Once a month	5	8	6	17	5	41	3	7	3	2	3	5	3	6	2	6
261	Female	164	61	22	No	Yes	3	1	1	3	1	2	2	2	2	1	1	1	1	1	1	Type 3	3-4 times a week	Once a month	Once in 15 days	5-6 times a week	3-4 times a week	Once in 15 days	1-2 times a week	Once a month	Once a month	2	7	3	8	3	23	3	6	5	2	3	5	4	6	2	6
262	Female	150	49	19	No	Yes	1	2	1	1	2	1	2	2	1	1	1	1	1	1	1	Type 4	1-2 times a week	None	Once in 15 days	5-6 times a week	3-4 times a week	1-2 times a week	Once in 15 days	Once a month	Once a month	3	4	3	6	3	19	4	7	5	2	3	4	5	6	2	6
263	Female	170	85	20	Yes	Yes	2	3	4	4	1	2	1	3	3	1	1	1	1	1	1	Type 3	3-4 times a week	Once in 15 days	Once in 15 days	Once in 15 days	Once a month	None	Once in 15 days	Once a month	Once a month	7	7	3	9	3	29	3	5	5	5	6	7	5	6	2	6
264	Male	189	71	21	No	Yes	1	1	1	1	1	1	1	1	1	1	1	1	1	1	1	Type 4	Once a month	Once a month	Once a month	Once a month	Once a month	Once a month	Once a month	Once a month	Once a month	2	3	3	4	3	15	6	6	6	6	6	6	6	6	2	6
265	Female	179	53	18	No	No	4	1	1	6	5	4	1	1	1	1	1	1	1	1	3	Type 4	Once in 15 days	None	1-2 times a week	Once in 15 days	Once a month	None	Once a month	Once a month	Once a month	2	15	3	7	5	32	5	7	4	5	6	7	6	6	2	6
266	Female	166	50	18	Yes	Yes	4	1	2	3	7	7	6	2	3	5	1	1	6	1	6	Type 3	5-6 times a week	None	Once in 15 days	3-4 times a week	3-4 times a week	None	None	Once a month	Once a month	3	14	3	18	17	55	2	7	5	3	3	7	7	6	2	6
267	Female	165	59	23	No	Yes	3	4	7	1	3	7	7	7	7	5	3	3	5	2	2	Type 4	1-2 times a week	None	Once a month	Every day	Every day	Every day	Every day	None	Once a month	11	7	8	28	12	66	4	7	6	1	1	1	1	7	2	6
268	Female	150	57	19	Yes	No	5	3	5	5	5	5	5	5	5	6	1	1	2	7	6	Type 4	3-4 times a week	None	3-4 times a week	Every day	Every day	1-2 times a week	Every day	None	Once a month	8	15	9	20	14	66	3	7	3	1	1	4	1	7	2	6
269	Male	187	105	18	No	Yes	1	1	2	4	1	2	2	1	1	1	1	1	1	1	1	Type 4	Once a month	None	Once in 15 days	3-4 times a week	1-2 times a week	Once in 15 days	Every day	None	Once a month	3	6	3	6	3	21	6	7	5	3	4	5	1	7	2	6
270	Male	188	79	30	No	Yes	5	5	5	5	5	5	5	6	6	4	2	3	6	6	1	Type 3	3-4 times a week	None	Once in 15 days	Every day	Once a month	Once a month	Every day	None	Once a month	10	15	11	22	11	69	3	7	5	1	6	6	1	7	2	6
271	Female	164	53	30	No	No	2	1	2	3	1	3	2	3	3	1	1	1	1	1	3	Type 4	Once in 15 days	None	None	1-2 times a week	Once in 15 days	1-2 times a week	5-6 times a week	None	Once a month	3	6	3	11	5	28	5	7	7	4	5	4	2	7	2	6
272	Female	162	65	22	No	Yes	1	1	1	6	1	7	1	7	7	1	7	6	1	1	1	Type 4	3-4 times a week	Once a month	Once a month	None	Every day	Once in 15 days	5-6 times a week	None	Once a month	2	8	14	22	3	49	3	6	6	7	1	5	2	7	2	6
273	Female	168	53	22	No	No	2	4	4	2	1	4	4	4	1	1	1	1	1	1	1	Type 4	5-6 times a week	None	1-2 times a week	5-6 times a week	5-6 times a week	Once a month	5-6 times a week	None	Once a month	8	5	3	13	3	32	2	7	4	2	2	6	2	7	2	6
274	Male	181	74	28	No	No	3	3	2	5	1	3	7	5	5	1	1	1	1	1	5	Type 3	1-2 times a week	None	Once in 15 days	5-6 times a week	1-2 times a week	Once a month	5-6 times a week	None	Once a month	5	9	3	20	7	44	4	7	5	2	4	6	2	7	2	6
275	Female	159	40	20	No	Yes	1	1	1	5	5	5	5	5	5	1	1	1	1	1	4	Type 4	1-2 times a week	None	Once in 15 days	3-4 times a week	3-4 times a week	5-6 times a week	3-4 times a week	None	Once a month	2	11	3	20	6	42	4	7	5	3	3	2	3	7	2	6
276	Female	164	61	22	Yes	Yes	2	1	2	2	2	2	2	2	2	2	1	1	1	1	1	Type 3	3-4 times a week	None	1-2 times a week	Every day	None	5-6 times a week	3-4 times a week	None	Once a month	3	6	3	8	4	24	3	7	4	1	7	2	3	7	2	6
277	Female	176	60	21	Yes	Yes	1	1	1	2	1	2	3	3	2	1	1	1	1	1	1	Type 3	Every day	None	1-2 times a week	3-4 times a week	3-4 times a week	3-4 times a week	3-4 times a week	None	Once a month	2	4	3	10	3	22	1	7	4	3	3	3	3	7	2	6
278	Male	165	54	19	No	No	3	1	1	3	1	3	1	2	3	1	1	1	1	1	1	Type 3	5-6 times a week	None	1-2 times a week	5-6 times a week	3-4 times a week	1-2 times a week	3-4 times a week	None	Once a month	2	7	3	9	3	24	2	7	4	2	3	4	3	7	2	6
279	Female	162	69	23	No	No	1	1	1	1	1	2	2	2	2	2	1	1	2	1	2	Type 3	3-4 times a week	None	3-4 times a week	Every day	Every day	Once in 15 days	3-4 times a week	None	Once a month	2	3	3	8	6	22	3	7	3	1	1	5	3	7	2	6
280	Female	172	59	18	No	No	1	1	1	1	1	4	1	1	1	1	1	1	1	1	1	Type 4	1-2 times a week	None	Once in 15 days	5-6 times a week	Once a month	Once a month	3-4 times a week	None	Once a month	2	3	3	7	3	18	4	7	5	2	6	6	3	7	2	6
281	Female	170	75	21	No	No	2	1	1	1	1	1	3	2	2	1	1	1	1	3	7	Type 3	Once in 15 days	None	3-4 times a week	1-2 times a week	Every day	1-2 times a week	1-2 times a week	None	Once a month	2	4	5	8	9	28	5	7	3	4	1	4	4	7	2	6
282	Female	162	49	37	No	No	1	1	1	1	1	1	1	1	1	1	2	1	1	1	1	Type 4	3-4 times a week	Once a month	3-4 times a week	3-4 times a week	Once in 15 days	1-2 times a week	1-2 times a week	None	Once a month	2	3	4	4	3	16	3	6	3	3	5	4	4	7	2	6
283	Female	175	45	19	No	Yes	2	1	1	2	1	2	2	1	1	1	1	1	1	1	2	Type 3	3-4 times a week	1-2 times a week	3-4 times a week	Every day	3-4 times a week	Once in 15 days	1-2 times a week	None	Once a month	2	5	3	6	4	20	3	4	3	1	3	5	4	7	2	6
284	Female	149	55	19	No	No	2	4	5	5	5	5	4	2	2	2	1	1	1	2	3	Type 3	Every day	None	5-6 times a week	Every day	1-2 times a week	1-2 times a week	Once in 15 days	None	Once a month	9	12	4	13	6	44	1	7	2	1	4	4	5	7	2	6
285	Male	176	76	20	No	No	2	1	1	3	4	5	1	1	1	1	1	1	1	1	1	Type 3	Once in 15 days	Once a month	3-4 times a week	Once in 15 days	Once in 15 days	Once in 15 days	Once in 15 days	None	Once a month	2	9	3	8	3	25	5	6	3	5	5	5	5	7	2	6
286	Female	168	49	20	Yes	Yes	1	2	1	5	3	7	7	1	2	1	3	6	1	1	3	Type 3	Every day	None	Once in 15 days	3-4 times a week	Every day	Once a month	Once in 15 days	None	Once a month	3	9	10	17	5	44	1	7	5	3	1	6	5	7	2	6
287	Male	198	97	22	No	Yes	1	1	1	1	1	2	2	2	2	1	1	1	1	1	1	Type 3	Once in 15 days	None	Once in 15 days	None	None	Once a month	Once in 15 days	None	Once a month	2	3	3	8	3	19	5	7	5	7	7	6	5	7	2	6
288	Female	152	55	22	Yes	Yes	1	1	1	2	1	2	2	1	1	1	3	3	1	1	1	Type 3	1-2 times a week	Once a month	Once a month	Once a month	Once a month	Once a month	Once a month	None	Once a month	2	4	7	6	3	22	4	6	6	6	6	6	6	7	2	6
289	Female	160	59	18	No	No	2	2	2	1	1	2	5	5	5	1	1	1	1	6	6	Type 3	5-6 times a week	None	5-6 times a week	5-6 times a week	3-4 times a week	Once in 15 days	None	None	Once a month	4	4	8	17	8	41	2	7	2	2	3	5	7	7	2	6
290	Female	153	49	25	No	No	1	1	1	7	1	7	3	1	1	1	1	1	1	1	2	Type 4	3-4 times a week	Once a month	Once in 15 days	3-4 times a week	3-4 times a week	Once in 15 days	None	None	Once a month	2	9	3	12	4	30	3	6	5	3	3	5	7	7	2	6
291	Female	163	54	20	Yes	Yes	3	3	3	7	1	3	3	1	1	1	1	4	1	1	1	Type 4	Once a month	None	Once in 15 days	1-2 times a week	Every day	Once a month	None	None	Once a month	6	11	6	8	3	34	6	7	5	4	1	6	7	7	2	6
292	Female	160	65	21	No	No	4	1	1	1	2	2	1	1	3	2	1	1	1	1	2	Type 3	3-4 times a week	None	1-2 times a week	5-6 times a week	5-6 times a week	None	None	None	Once a month	2	7	3	7	5	24	3	7	4	2	2	7	7	7	2	6
293	Female	169	62	23	Yes	No	1	1	1	1	1	1	1	1	1	1	1	1	1	1	1	Type 5	Every day	None	5-6 times a week	Every day	Once in 15 days	Every day	Every day	Every day	Once a month	2	3	3	4	3	15	1	7	2	1	5	1	1	1	3	6
294	Female	164	52	20	No	No	7	1	1	6	4	6	7	1	1	1	2	2	1	2	1	Type 5	5-6 times a week	None	Once in 15 days	5-6 times a week	Once a month	5-6 times a week	5-6 times a week	1-2 times a week	Once a month	2	17	6	15	3	43	2	7	5	2	6	2	2	4	3	6
295	Male	179	87	22	Yes	Yes	2	1	4	1	1	1	1	1	1	1	1	1	1	1	1	Type 5	Every day	None	1-2 times a week	3-4 times a week	1-2 times a week	3-4 times a week	3-4 times a week	1-2 times a week	Once a month	5	4	3	4	3	19	1	7	4	3	4	3	3	4	3	6
296	Female	171	70	27	Yes	No	6	1	2	3	3	5	4	4	4	3	2	2	2	2	3	Type 5	Once in 15 days	Once a month	Once a month	1-2 times a week	3-4 times a week	Once a month	Once a month	Once in 15 days	Once a month	3	12	6	17	8	46	5	6	6	4	3	6	6	5	3	6
297	Female	153	58	19	No	No	2	2	1	2	1	2	1	1	2	1	2	1	1	1	1	Type 5	1-2 times a week	None	1-2 times a week	3-4 times a week	None	Once in 15 days	3-4 times a week	Once a month	Once a month	3	5	4	6	3	21	4	7	4	3	7	5	3	6	3	6
298	Female	162	56	20	No	No	5	5	1	3	1	3	3	2	3	2	1	2	2	2	2	Type 6	Every day	None	1-2 times a week	5-6 times a week	5-6 times a week	Once in 15 days	Every day	None	Once a month	6	9	5	11	6	37	1	7	4	2	2	5	1	7	3	6
299	Female	180	60	22	No	No	5	1	1	2	2	3	1	1	1	2	3	3	2	3	3	Type 6	5-6 times a week	None	5-6 times a week	3-4 times a week	3-4 times a week	3-4 times a week	5-6 times a week	None	Once a month	2	9	9	6	7	33	2	7	2	3	3	3	2	7	3	6
300	Female	178	50	21	No	Yes	1	1	1	1	1	2	1	1	1	1	1	1	3	1	1	Type 5	None	None	Once a month	Once a month	Once in 15 days	Once a month	1-2 times a week	None	Once a month	2	3	3	5	5	18	7	7	6	6	5	6	4	7	3	6
301	Female	162	49	18	No	No	4	3	1	6	3	7	6	1	3	2	3	1	1	5	2	Type 6	3-4 times a week	Once a month	3-4 times a week	1-2 times a week	Once a month	Once in 15 days	Once in 15 days	None	Once a month	4	13	9	17	5	48	3	6	3	4	6	5	5	7	3	6
302	Male	183	74	21	Yes	Yes	1	1	1	2	4	7	4	1	1	1	1	1	1	5	1	Type 5	Once in 15 days	None	Once a month	Once in 15 days	Once in 15 days	Once in 15 days	Once a month	None	Once a month	2	7	7	13	3	32	5	7	6	5	5	5	6	7	3	6
303	Female	166	55	22	No	Yes	1	1	1	1	2	2	1	1	1	1	1	1	1	2	2	Type 5	1-2 times a week	None	Once a month	None	5-6 times a week	Once a month	None	None	Once a month	2	4	4	5	4	19	4	7	6	7	2	6	7	7	3	6
304	Female	165	71	20	Yes	No	1	3	1	2	1	6	3	1	1	1	2	3	1	3	1	Type 5	1-2 times a week	None	None	None	3-4 times a week	None	None	None	Once a month	4	4	8	11	3	30	4	7	7	7	3	7	7	7	3	6
305	Female	155	48	20	No	No	7	6	4	4	4	4	4	3	5	5	5	4	7	7	7	Type 1	1-2 times a week	None	Once a month	1-2 times a week	3-4 times a week	3-4 times a week	Every day	Every day	None	10	15	16	16	19	76	4	7	6	4	3	3	1	1	1	7
306	Female	170	64	21	Yes	Yes	1	1	1	3	1	2	2	1	1	1	1	1	1	1	1	Type 2	Every day	None	1-2 times a week	Every day	Every day	1-2 times a week	Every day	Every day	None	2	5	3	6	3	19	1	7	4	1	1	4	1	1	1	7
307	Female	166	59	21	No	No	6	3	1	6	1	7	7	1	4	7	1	1	4	2	5	Type 1	3-4 times a week	Once in 15 days	Once in 15 days	3-4 times a week	1-2 times a week	3-4 times a week	3-4 times a week	Every day	None	4	13	4	19	16	56	3	5	5	3	4	3	3	1	1	7
308	Female	171	64	22	Yes	Yes	2	2	1	1	1	1	1	1	4	4	1	1	3	2	4	Type 2	Once a month	Once a month	Once in 15 days	Once in 15 days	5-6 times a week	Once in 15 days	5-6 times a week	3-4 times a week	None	3	4	4	7	11	29	6	6	5	5	2	5	2	3	1	7
309	Female	165	59	22	No	Yes	1	5	1	1	1	7	7	1	7	6	1	1	7	2	7	Type 2	Once in 15 days	Once a month	Once a month	5-6 times a week	3-4 times a week	Once a month	3-4 times a week	3-4 times a week	None	6	3	4	22	20	55	5	6	6	2	3	6	3	3	1	7
310	Female	171	60	22	No	No	4	1	1	1	1	6	7	3	3	1	1	1	1	1	1	Type 2	3-4 times a week	None	None	1-2 times a week	1-2 times a week	5-6 times a week	3-4 times a week	1-2 times a week	None	2	6	3	19	3	33	3	7	7	4	4	2	3	4	1	7
311	Female	153	59	21	No	No	3	2	1	7	1	7	7	2	6	3	1	1	4	2	5	Type 2	1-2 times a week	None	Once a month	5-6 times a week	Once in 15 days	Once a month	3-4 times a week	1-2 times a week	None	3	11	4	22	12	52	4	7	6	2	5	6	3	4	1	7
312	Female	162	70	21	No	No	3	3	1	3	1	7	7	2	2	7	1	1	1	1	7	Type 2	1-2 times a week	1-2 times a week	1-2 times a week	Every day	Once a month	Once a month	3-4 times a week	1-2 times a week	None	4	7	3	18	15	47	4	4	4	1	6	6	3	4	1	7
313	Female	150	45	20	No	No	1	1	3	2	3	1	4	1	1	7	4	3	3	7	2	Type 2	5-6 times a week	None	Once in 15 days	5-6 times a week	5-6 times a week	Once in 15 days	1-2 times a week	1-2 times a week	None	4	6	14	7	12	43	2	7	5	2	2	5	4	4	1	7
314	Female	169	61	20	No	No	2	3	3	2	2	3	3	1	2	4	1	1	3	6	6	Type 2	Every day	1-2 times a week	None	None	None	None	None	1-2 times a week	None	6	6	8	9	13	42	1	4	7	7	7	7	7	4	1	7
315	Female	162	67	20	Yes	Yes	6	4	1	7	7	7	7	1	4	7	2	1	1	4	7	Type 2	Every day	Once in 15 days	5-6 times a week	5-6 times a week	1-2 times a week	5-6 times a week	1-2 times a week	Once in 15 days	None	5	20	7	19	15	66	1	5	2	2	4	2	4	5	1	7
316	Female	162	71	19	No	Yes	3	5	4	1	1	6	6	2	6	4	1	1	6	1	5	Type 2	1-2 times a week	Once a month	1-2 times a week	Once a month	Once a month	Once in 15 days	None	Once in 15 days	None	9	5	3	20	15	52	4	6	4	6	6	5	7	5	1	7
317	Female	167	70	22	Yes	Yes	5	5	4	5	4	4	4	2	3	5	2	1	4	1	6	Type 1	1-2 times a week	None	1-2 times a week	1-2 times a week	3-4 times a week	3-4 times a week	3-4 times a week	Once a month	None	9	14	4	13	15	55	4	7	4	4	3	3	3	6	1	7
318	Female	160	40	22	No	No	1	1	1	1	1	1	1	1	1	1	1	1	1	1	1	Type 1	3-4 times a week	Once a month	Once a month	Every day	None	Once in 15 days	3-4 times a week	Once a month	None	2	3	3	4	3	15	3	6	6	1	7	5	3	6	1	7
319	Female	165	56	22	No	No	5	5	6	4	6	4	5	7	7	7	7	7	7	7	7	Type 2	Once in 15 days	None	Once in 15 days	None	1-2 times a week	Once a month	3-4 times a week	Once a month	None	11	15	21	23	21	91	5	7	5	7	4	6	3	6	1	7
320	Female	168	54	21	No	No	1	1	1	2	3	3	3	1	1	2	1	1	1	1	7	Type 2	3-4 times a week	None	Once a month	3-4 times a week	3-4 times a week	Once a month	1-2 times a week	Once a month	None	2	6	3	8	10	29	3	7	6	3	3	6	4	6	1	7
321	Female	178	56	22	No	Yes	6	6	2	1	1	5	6	5	2	7	1	3	4	4	6	Type 2	1-2 times a week	Once a month	Once in 15 days	3-4 times a week	1-2 times a week	Once a month	1-2 times a week	Once a month	None	8	8	8	18	17	59	4	6	5	3	4	6	4	6	1	7
322	Female	160	59	21	No	Yes	1	1	1	5	1	5	5	5	4	5	5	4	2	4	2	Type 2	5-6 times a week	1-2 times a week	1-2 times a week	Every day	Once a month	Once in 15 days	Once in 15 days	Once a month	None	2	7	13	19	9	50	2	4	4	1	6	5	5	6	1	7
323	Female	169	70	21	Yes	Yes	1	2	2	2	1	7	5	5	5	5	1	1	4	6	6	Type 2	Every day	None	Once in 15 days	1-2 times a week	Once in 15 days	3-4 times a week	Once a month	Once a month	None	4	4	8	22	15	53	1	7	5	4	5	3	6	6	1	7
324	Female	168	53	22	Yes	Yes	2	4	6	3	4	3	2	2	2	1	3	3	1	1	1	Type 2	1-2 times a week	Once a month	Once in 15 days	5-6 times a week	5-6 times a week	None	None	Once a month	None	10	9	7	9	3	38	4	6	5	2	2	7	7	6	1	7
325	Female	171	70	38	No	No	3	4	1	4	1	5	3	3	2	6	1	1	3	4	4	Type 2	Once in 15 days	None	Once in 15 days	3-4 times a week	Every day	1-2 times a week	Every day	None	None	5	8	6	13	13	45	5	7	5	3	1	4	1	7	1	7
326	Female	160	69	20	Yes	No	3	1	1	3	1	4	1	6	6	3	1	1	7	3	7	Type 2	3-4 times a week	None	Once in 15 days	Every day	Once a month	1-2 times a week	Every day	None	None	2	7	5	17	17	48	3	7	5	1	6	4	1	7	1	7
327	Female	170	59	25	Yes	Yes	4	6	7	6	1	7	7	7	7	7	1	1	7	1	7	Type 2	Every day	None	Once a month	Every day	Once a month	1-2 times a week	Every day	None	None	13	11	3	28	21	76	1	7	6	1	6	4	1	7	1	7
328	Female	169	55	19	No	No	1	1	1	1	2	2	1	1	1	7	1	1	7	1	7	Type 1	3-4 times a week	None	1-2 times a week	5-6 times a week	Every day	Once in 15 days	Every day	None	None	2	4	3	5	21	35	3	7	4	2	1	5	1	7	1	7
329	Female	187	56	19	No	No	1	1	1	2	1	1	1	1	1	1	1	1	1	2	1	Type 2	1-2 times a week	1-2 times a week	1-2 times a week	Every day	3-4 times a week	Once a month	Every day	None	None	2	4	4	4	3	17	4	4	4	1	3	6	1	7	1	7
330	Female	160	47	22	No	No	1	1	2	1	1	3	3	3	3	5	1	1	4	1	5	Type 2	Every day	Once a month	1-2 times a week	Every day	1-2 times a week	Once a month	Every day	None	None	3	3	3	12	14	35	1	6	4	1	4	6	1	7	1	7
331	Female	162	45	26	Yes	Yes	2	1	2	2	1	1	2	2	2	2	1	1	1	2	2	Type 2	Every day	None	Once in 15 days	Every day	1-2 times a week	None	Every day	None	None	3	5	4	7	5	24	1	7	5	1	4	7	1	7	1	7
332	Female	168	69	18	No	No	1	1	1	1	1	4	5	1	3	1	1	1	1	2	3	Type 2	3-4 times a week	Once a month	1-2 times a week	Every day	3-4 times a week	Once a month	5-6 times a week	None	None	2	3	4	13	5	27	3	6	4	1	3	6	2	7	1	7
333	Female	160	59	18	No	Yes	6	6	4	5	6	6	7	4	5	6	4	6	2	1	4	Type 2	3-4 times a week	None	5-6 times a week	3-4 times a week	1-2 times a week	3-4 times a week	3-4 times a week	None	None	10	17	11	22	12	72	3	7	2	3	4	3	3	7	1	7
334	Female	154	53	20	No	No	5	4	1	3	1	7	7	4	2	7	5	5	5	7	7	Type 2	Once in 15 days	None	Once in 15 days	1-2 times a week	Once a month	1-2 times a week	3-4 times a week	None	None	5	9	17	20	19	70	5	7	5	4	6	4	3	7	1	7
335	Female	177	48	19	No	No	5	5	1	7	2	5	7	2	7	7	1	1	7	6	7	Type 1	5-6 times a week	None	Once in 15 days	1-2 times a week	Every day	None	3-4 times a week	None	None	6	14	8	21	21	70	2	7	5	4	1	7	3	7	1	7
336	Female	181	52	21	No	No	4	6	3	3	5	5	5	4	2	4	3	3	2	1	5	Type 2	1-2 times a week	None	Once a month	3-4 times a week	Once in 15 days	None	3-4 times a week	None	None	9	12	7	16	11	55	4	7	6	3	5	7	3	7	1	7
337	Female	181	54	20	No	No	1	1	1	2	2	2	2	2	2	1	2	2	1	2	1	Type 2	3-4 times a week	1-2 times a week	1-2 times a week	3-4 times a week	3-4 times a week	3-4 times a week	1-2 times a week	None	None	2	5	6	8	3	24	3	4	4	3	3	3	4	7	1	7
338	Female	160	70	22	Yes	Yes	2	1	1	1	1	3	6	1	2	2	2	1	2	1	5	Type 2	Once in 15 days	None	Once a month	3-4 times a week	3-4 times a week	1-2 times a week	1-2 times a week	None	None	2	4	4	12	9	31	5	7	6	3	3	4	4	7	1	7
339	Female	159	55	24	No	No	6	1	2	4	1	7	7	7	7	7	7	7	6	6	7	Type 1	Every day	1-2 times a week	1-2 times a week	1-2 times a week	Once a month	Once a month	1-2 times a week	None	None	3	11	20	28	20	82	1	4	4	4	6	6	4	7	1	7
340	Female	165	52	24	No	No	2	5	3	3	1	3	1	1	5	5	1	1	5	2	7	Type 1	Every day	None	Once in 15 days	5-6 times a week	5-6 times a week	None	1-2 times a week	None	None	8	6	4	10	17	45	1	7	5	2	2	7	4	7	1	7
341	Female	160	68	23	No	No	1	1	1	1	2	2	2	1	1	2	1	1	1	1	1	Type 2	1-2 times a week	None	1-2 times a week	Every day	None	None	1-2 times a week	None	None	2	4	3	6	4	19	4	7	4	1	7	7	4	7	1	7
342	Female	167	68	19	No	Yes	5	1	1	5	4	3	5	4	4	7	1	1	6	1	6	Type 1	1-2 times a week	None	Once in 15 days	Every day	None	None	1-2 times a week	None	None	2	14	3	16	19	54	4	7	5	1	7	7	4	7	1	7
343	Female	173	63	20	No	No	1	1	1	1	2	1	2	1	1	1	1	1	1	1	1	Type 2	5-6 times a week	Once a month	Once a month	1-2 times a week	Every day	None	Once a month	None	None	2	4	3	5	3	17	2	6	6	4	1	7	6	7	1	7
344	Female	167	70	20	No	Yes	1	3	2	1	1	7	5	3	3	1	2	1	1	1	2	Type 2	Every day	None	1-2 times a week	5-6 times a week	Once a month	Once a month	None	None	None	5	3	4	18	4	34	1	7	4	2	6	6	7	7	1	7
345	Female	171	78	23	No	No	2	3	1	2	2	2	2	2	2	2	1	2	3	3	2	Type 2	3-4 times a week	None	5-6 times a week	Every day	Every day	None	None	None	None	4	6	6	8	7	31	3	7	2	1	1	7	7	7	1	7
346	Female	169	52	22	No	No	4	5	6	3	7	1	7	1	2	6	1	1	3	1	6	Type 1	1-2 times a week	Once a month	3-4 times a week	None	Every day	None	None	None	None	11	14	3	11	15	54	4	6	3	7	1	7	7	7	1	7
347	Female	158	72	21	No	No	2	1	4	3	3	3	2	1	2	6	1	1	6	6	5	Type 2	1-2 times a week	None	None	1-2 times a week	None	None	None	None	None	5	8	8	8	17	46	4	7	7	4	7	7	7	7	1	7
348	Female	169	52	20	Yes	No	1	1	2	2	1	2	1	2	1	1	1	1	1	2	2	Type 4	5-6 times a week	5-6 times a week	5-6 times a week	Every day	Every day	3-4 times a week	Every day	Every day	None	3	4	4	6	4	21	2	2	2	1	1	3	1	1	2	7
349	Female	169	54	20	No	No	1	2	1	1	1	2	1	2	1	1	1	1	1	2	2	Type 3	1-2 times a week	None	3-4 times a week	Every day	Every day	1-2 times a week	Every day	Every day	None	3	3	4	6	4	20	4	7	3	1	1	4	1	1	2	7
350	Female	161	53	19	No	No	5	2	1	1	2	5	5	5	5	3	1	1	5	5	5	Type 3	3-4 times a week	None	Once in 15 days	Every day	Every day	Once in 15 days	Every day	Every day	None	3	8	7	20	13	51	3	7	5	1	1	5	1	1	2	7
351	Female	159	59	21	No	No	1	1	1	1	1	1	1	1	2	3	1	1	2	1	1	Type 3	Once a month	None	Once in 15 days	Every day	Once a month	Once in 15 days	Every day	Every day	None	2	3	3	5	6	19	6	7	5	1	6	5	1	1	2	7
352	Female	160	48	21	Yes	Yes	1	1	1	3	1	4	3	3	4	1	2	1	1	1	2	Type 3	3-4 times a week	None	1-2 times a week	Every day	None	Once in 15 days	Every day	Every day	None	2	5	4	14	4	29	3	7	4	1	7	5	1	1	2	7
353	Female	161	60	19	No	No	3	7	4	1	7	1	1	1	1	1	1	1	1	1	1	Type 4	Every day	None	Once a month	Every day	1-2 times a week	Once a month	Every day	Every day	None	11	11	3	4	3	32	1	7	6	1	4	6	1	1	2	7
354	Female	160	63	20	No	Yes	2	4	3	3	2	6	5	6	6	2	1	1	2	1	4	Type 3	3-4 times a week	None	3-4 times a week	Once in 15 days	1-2 times a week	1-2 times a week	5-6 times a week	Every day	None	7	7	3	23	8	48	3	7	3	5	4	4	2	1	2	7
355	Female	176	53	22	No	No	1	3	3	1	1	2	2	2	1	1	1	1	1	1	1	Type 4	5-6 times a week	None	Once a month	Every day	1-2 times a week	1-2 times a week	3-4 times a week	Every day	None	6	3	3	7	3	22	2	7	6	1	4	4	3	1	2	7
356	Female	178	91	19	No	Yes	3	2	1	2	3	3	4	3	5	4	5	2	2	1	3	Type 4	1-2 times a week	None	1-2 times a week	Every day	3-4 times a week	5-6 times a week	Every day	5-6 times a week	None	3	8	8	15	9	43	4	7	4	1	3	2	1	2	2	7
357	Male	177	53	22	Yes	No	2	2	2	3	1	3	2	1	2	1	2	1	1	3	2	Type 3	3-4 times a week	None	5-6 times a week	Every day	3-4 times a week	5-6 times a week	5-6 times a week	5-6 times a week	None	4	6	6	8	4	28	3	7	2	1	3	2	2	2	2	7
358	Female	152	78	20	No	Yes	1	1	1	1	1	2	3	1	2	2	1	1	1	1	2	Type 3	5-6 times a week	None	Once in 15 days	1-2 times a week	1-2 times a week	5-6 times a week	5-6 times a week	5-6 times a week	None	2	3	3	8	5	21	2	7	5	4	4	2	2	2	2	7
359	Female	167	55	22	No	Yes	1	4	2	2	1	3	1	1	1	1	1	1	1	1	1	Type 3	Once in 15 days	None	None	3-4 times a week	5-6 times a week	Once a month	5-6 times a week	5-6 times a week	None	6	4	3	6	3	22	5	7	7	3	2	6	2	2	2	7
360	Female	171	70	23	Yes	Yes	4	3	6	1	1	3	1	1	2	1	4	4	1	1	1	Type 3	3-4 times a week	None	1-2 times a week	5-6 times a week	5-6 times a week	3-4 times a week	3-4 times a week	5-6 times a week	None	9	6	9	7	3	34	3	7	4	2	2	3	3	2	2	7
361	Female	157	55	21	No	No	1	1	2	1	4	7	4	6	6	6	1	4	5	1	1	Type 3	Every day	None	5-6 times a week	Every day	3-4 times a week	Every day	Every day	3-4 times a week	None	3	6	6	23	12	50	1	7	2	1	3	1	1	3	2	7
362	Female	162	69	23	No	Yes	4	2	1	5	6	7	6	1	1	1	1	1	1	1	1	Type 4	5-6 times a week	Once a month	Once a month	Every day	3-4 times a week	3-4 times a week	Every day	3-4 times a week	None	3	15	3	15	3	39	2	6	6	1	3	3	1	3	2	7
363	Female	174	56	21	No	No	2	2	2	1	1	1	2	2	2	1	1	1	1	1	1	Type 4	1-2 times a week	None	3-4 times a week	3-4 times a week	1-2 times a week	1-2 times a week	Every day	3-4 times a week	None	4	4	3	7	3	21	4	7	3	3	4	4	1	3	2	7
364	Female	169	67	21	No	No	1	1	1	1	1	3	3	1	1	1	1	1	1	1	1	Type 4	Once in 15 days	None	Once in 15 days	Every day	Every day	Once in 15 days	Every day	3-4 times a week	None	2	3	3	8	3	19	5	7	5	1	1	5	1	3	2	7
365	Female	168	56	18	No	Yes	5	4	2	3	3	4	6	2	2	1	1	1	1	1	1	Type 4	3-4 times a week	None	None	1-2 times a week	Every day	1-2 times a week	5-6 times a week	3-4 times a week	None	6	11	3	14	3	37	3	7	7	4	1	4	2	3	2	7
366	Female	169	55	22	No	Yes	2	4	2	1	2	3	3	2	3	1	3	2	1	2	2	Type 3	5-6 times a week	None	1-2 times a week	5-6 times a week	1-2 times a week	1-2 times a week	5-6 times a week	3-4 times a week	None	6	5	7	11	4	33	2	7	4	2	4	4	2	3	2	7
367	Male	181	70	22	Yes	Yes	1	2	1	1	1	1	2	1	1	1	1	1	1	1	1	Type 4	Once in 15 days	None	1-2 times a week	3-4 times a week	3-4 times a week	None	5-6 times a week	3-4 times a week	None	3	3	3	5	3	17	5	7	4	3	3	7	2	3	2	7
368	Female	168	50	21	No	No	1	3	2	2	1	2	3	1	1	1	2	2	2	3	1	Type 4	3-4 times a week	Once in 15 days	1-2 times a week	3-4 times a week	3-4 times a week	Once in 15 days	3-4 times a week	3-4 times a week	None	5	4	7	7	4	27	3	5	4	3	3	5	3	3	2	7
369	Female	169	56	22	No	No	1	1	1	1	2	2	3	1	1	1	1	1	1	1	1	Type 3	1-2 times a week	None	1-2 times a week	1-2 times a week	1-2 times a week	Once in 15 days	3-4 times a week	3-4 times a week	None	2	4	3	7	3	19	4	7	4	4	4	5	3	3	2	7
370	Female	153	67	18	No	Yes	1	1	1	1	1	2	1	1	1	1	1	1	1	1	1	Type 4	Every day	None	1-2 times a week	3-4 times a week	5-6 times a week	5-6 times a week	1-2 times a week	3-4 times a week	None	2	3	3	5	3	16	1	7	4	3	2	2	4	3	2	7
371	Female	156	55	23	Yes	Yes	3	4	4	7	5	7	7	1	1	1	1	1	1	2	1	Type 3	1-2 times a week	Once in 15 days	Once in 15 days	1-2 times a week	3-4 times a week	None	1-2 times a week	3-4 times a week	None	8	15	4	16	3	46	4	5	5	4	3	7	4	3	2	7
372	Male	180	70	21	No	Yes	2	5	2	3	1	2	3	2	3	1	1	1	1	1	2	Type 3	1-2 times a week	None	1-2 times a week	1-2 times a week	1-2 times a week	Once in 15 days	Once a month	3-4 times a week	None	7	6	3	10	4	30	4	7	4	4	4	5	6	3	2	7
373	Female	164	59	27	No	Yes	1	4	1	1	1	1	3	1	1	1	1	1	1	1	1	Type 4	Every day	Once a month	Once in 15 days	Every day	Every day	1-2 times a week	Every day	1-2 times a week	None	5	3	3	6	3	20	1	6	5	1	1	4	1	4	2	7
374	Female	162	50	23	No	Yes	2	2	1	2	1	2	1	1	1	1	1	1	1	1	1	Type 3	1-2 times a week	None	Once a month	Every day	Every day	1-2 times a week	Every day	1-2 times a week	None	3	5	3	5	3	19	4	7	6	1	1	4	1	4	2	7
375	Female	169	52	19	No	Yes	2	1	1	4	1	5	4	1	2	1	1	4	1	1	3	Type 4	3-4 times a week	None	Once in 15 days	Every day	5-6 times a week	Once a month	Every day	1-2 times a week	None	2	7	6	12	5	32	3	7	5	1	2	6	1	4	2	7
376	Female	162	52	32	Yes	No	1	2	1	1	2	1	1	2	1	1	1	1	1	1	1	Type 4	1-2 times a week	Once in 15 days	Once in 15 days	Every day	Every day	None	Every day	1-2 times a week	None	3	4	3	5	3	18	4	5	5	1	1	7	1	4	2	7
377	Female	168	60	23	No	Yes	6	1	1	4	2	3	1	1	3	1	1	1	1	1	3	Type 3	5-6 times a week	None	Once a month	5-6 times a week	5-6 times a week	None	Every day	1-2 times a week	None	2	12	3	8	5	30	2	7	6	2	2	7	1	4	2	7
378	Female	170	55	35	No	No	1	1	1	1	1	1	1	1	1	1	1	1	1	1	1	Type 4	3-4 times a week	None	1-2 times a week	5-6 times a week	3-4 times a week	3-4 times a week	5-6 times a week	1-2 times a week	None	2	3	3	4	3	15	3	7	4	2	3	3	2	4	2	7
379	Female	167	60	18	No	No	5	1	1	3	2	3	3	2	3	1	1	1	1	1	3	Type 3	Once in 15 days	None	Once in 15 days	5-6 times a week	1-2 times a week	1-2 times a week	5-6 times a week	1-2 times a week	None	2	10	3	11	5	31	5	7	5	2	4	4	2	4	2	7
380	Female	159	77	19	No	Yes	1	3	1	6	1	6	6	6	3	3	3	1	1	1	6	Type 3	3-4 times a week	None	None	Every day	3-4 times a week	Once in 15 days	5-6 times a week	1-2 times a week	None	4	8	5	21	10	48	3	7	7	1	3	5	2	4	2	7
381	Female	157	62	22	No	Yes	3	1	1	2	3	2	1	2	3	1	2	2	3	1	2	Type 3	None	None	3-4 times a week	3-4 times a week	3-4 times a week	1-2 times a week	3-4 times a week	1-2 times a week	None	2	8	5	8	6	29	7	7	3	3	3	4	3	4	2	7
382	Female	168	53	18	No	No	6	6	6	5	5	6	7	5	5	1	3	1	1	3	4	Type 4	1-2 times a week	Once in 15 days	1-2 times a week	1-2 times a week	Once in 15 days	3-4 times a week	1-2 times a week	1-2 times a week	None	12	16	7	23	6	64	4	5	4	4	5	3	4	4	2	7
383	Male	187	78	23	Yes	Yes	1	2	1	3	1	2	2	1	1	1	1	1	1	1	1	Type 4	1-2 times a week	None	Once in 15 days	1-2 times a week	1-2 times a week	Once in 15 days	1-2 times a week	1-2 times a week	None	3	5	3	6	3	20	4	7	5	4	4	5	4	4	2	7
384	Female	161	54	21	No	No	4	5	2	3	1	7	6	4	1	4	1	6	1	1	2	Type 3	3-4 times a week	None	5-6 times a week	1-2 times a week	Once in 15 days	Once in 15 days	1-2 times a week	1-2 times a week	None	7	8	8	18	7	48	3	7	2	4	5	5	4	4	2	7
385	Male	178	73	22	No	No	1	2	4	4	1	4	4	4	5	1	1	1	1	1	1	Type 3	3-4 times a week	None	Once a month	3-4 times a week	None	Once in 15 days	1-2 times a week	1-2 times a week	None	6	6	3	17	3	35	3	7	6	3	7	5	4	4	2	7
386	Female	168	63	23	No	No	1	2	1	1	1	3	6	3	3	1	3	3	3	4	4	Type 4	3-4 times a week	1-2 times a week	1-2 times a week	3-4 times a week	3-4 times a week	Once a month	1-2 times a week	1-2 times a week	None	3	3	10	15	8	39	3	4	4	3	3	6	4	4	2	7
387	Female	159	46	19	No	No	2	1	1	2	1	2	1	2	2	2	1	1	1	1	2	Type 3	1-2 times a week	None	Once a month	1-2 times a week	Once in 15 days	None	1-2 times a week	1-2 times a week	None	2	5	3	7	5	22	4	7	6	4	5	7	4	4	2	7
388	Female	160	65	20	Yes	Yes	1	1	1	1	1	3	5	7	1	1	1	1	1	1	1	Type 4	Once in 15 days	Once a month	Once in 15 days	Once a month	1-2 times a week	3-4 times a week	Once in 15 days	1-2 times a week	None	2	3	3	16	3	27	5	6	5	6	4	3	5	4	2	7
389	Female	169	56	23	No	No	6	4	6	7	6	7	7	7	7	6	7	7	5	7	7	Type 3	3-4 times a week	Once a month	Once in 15 days	3-4 times a week	3-4 times a week	Once in 15 days	Once a month	1-2 times a week	None	10	19	21	28	18	96	3	6	5	3	3	5	6	4	2	7
390	Male	188	80	22	No	Yes	4	6	6	1	2	2	5	4	3	1	1	1	1	1	2	Type 3	Once a month	5-6 times a week	Once in 15 days	3-4 times a week	Once in 15 days	3-4 times a week	Every day	Once in 15 days	None	12	7	3	14	4	40	6	2	5	3	5	3	1	5	2	7
391	Female	164	59	19	No	Yes	3	2	3	2	3	4	5	4	6	5	5	1	1	2	1	Type 3	5-6 times a week	Once in 15 days	1-2 times a week	5-6 times a week	3-4 times a week	5-6 times a week	5-6 times a week	Once in 15 days	None	5	8	8	19	7	47	2	5	4	2	3	2	2	5	2	7
392	Female	160	58	30	No	No	1	1	1	2	2	2	1	1	1	2	1	1	1	1	2	Type 4	3-4 times a week	None	3-4 times a week	3-4 times a week	3-4 times a week	5-6 times a week	5-6 times a week	Once in 15 days	None	2	5	3	5	5	20	3	7	3	3	3	2	2	5	2	7
393	Female	168	70	23	Yes	No	5	3	2	1	2	2	3	3	2	2	1	1	1	1	6	Type 3	3-4 times a week	Once a month	1-2 times a week	Every day	Once in 15 days	1-2 times a week	5-6 times a week	Once in 15 days	None	5	8	3	10	9	35	3	6	4	1	5	4	2	5	2	7
394	Female	166	67	22	No	No	5	1	1	5	5	5	5	1	7	7	5	7	7	3	7	Type 4	5-6 times a week	None	Once in 15 days	5-6 times a week	Once in 15 days	Once a month	5-6 times a week	Once in 15 days	None	2	15	15	18	21	71	2	7	5	2	5	6	2	5	2	7
395	Female	169	59	21	No	No	2	2	1	2	2	1	1	1	1	2	1	1	1	1	2	Type 4	1-2 times a week	Once in 15 days	Once in 15 days	3-4 times a week	1-2 times a week	1-2 times a week	3-4 times a week	Once in 15 days	None	3	6	3	4	5	21	4	5	5	3	4	4	3	5	2	7
396	Female	160	59	21	Yes	Yes	1	2	2	3	3	5	5	5	5	5	1	1	1	1	4	Type 3	Once in 15 days	None	Once in 15 days	3-4 times a week	1-2 times a week	None	3-4 times a week	Once in 15 days	None	4	7	3	20	10	44	5	7	5	3	4	7	3	5	2	7
397	Male	160	63	19	No	No	1	1	1	1	1	2	1	1	1	2	1	1	1	1	1	Type 3	5-6 times a week	Once a month	1-2 times a week	3-4 times a week	1-2 times a week	3-4 times a week	1-2 times a week	Once in 15 days	None	2	3	3	5	4	17	2	6	4	3	4	3	4	5	2	7
398	Female	162	57	24	Yes	Yes	1	1	1	1	1	2	7	1	1	1	4	2	1	3	1	Type 4	1-2 times a week	None	Once a month	1-2 times a week	Once in 15 days	1-2 times a week	1-2 times a week	Once in 15 days	None	2	3	9	11	3	28	4	7	6	4	5	4	4	5	2	7
399	Female	164	76	19	Yes	No	4	7	7	2	2	3	1	1	3	1	1	1	2	2	1	Type 4	3-4 times a week	None	1-2 times a week	Every day	5-6 times a week	Once in 15 days	Once in 15 days	Once in 15 days	None	14	8	4	8	4	38	3	7	4	1	2	5	5	5	2	7
400	Female	160	49	24	No	No	4	2	2	2	2	2	4	2	2	2	2	2	2	2	4	Type 3	Every day	None	Once in 15 days	3-4 times a week	Every day	5-6 times a week	Once a month	Once in 15 days	None	4	8	6	10	8	36	1	7	5	3	1	2	6	5	2	7
401	Female	148	61	19	No	No	2	4	4	1	1	3	3	4	3	1	1	1	1	1	1	Type 4	3-4 times a week	1-2 times a week	Once in 15 days	1-2 times a week	1-2 times a week	Once a month	Once a month	Once in 15 days	None	8	4	3	13	3	31	3	4	5	4	4	6	6	5	2	7
402	Female	169	48	19	No	No	1	1	1	1	1	2	1	2	2	1	1	1	1	1	1	Type 4	1-2 times a week	None	Once in 15 days	None	None	None	None	Once in 15 days	None	2	3	3	7	3	18	4	7	5	7	7	7	7	5	2	7
403	Female	158	71	20	Yes	No	1	3	2	5	1	4	4	1	2	3	1	1	3	6	6	Type 3	5-6 times a week	None	Once in 15 days	Every day	Every day	3-4 times a week	Every day	Once a month	None	5	7	8	11	12	43	2	7	5	1	1	3	1	6	2	7
404	Female	173	60	22	No	No	5	1	7	7	1	7	7	7	7	7	1	1	1	7	1	Type 4	1-2 times a week	Once a month	1-2 times a week	5-6 times a week	3-4 times a week	3-4 times a week	Every day	Once a month	None	8	13	9	28	9	67	4	6	4	2	3	3	1	6	2	7
405	Female	177	56	21	No	No	1	1	1	5	2	2	6	5	2	1	1	1	3	3	7	Type 3	Once in 15 days	None	Once a month	Every day	Every day	1-2 times a week	Every day	Once a month	None	2	8	5	15	11	41	5	7	6	1	1	4	1	6	2	7
406	Male	155	60	22	Yes	Yes	4	2	1	2	2	2	1	1	2	1	1	1	2	2	1	Type 3	1-2 times a week	None	Once in 15 days	5-6 times a week	Once in 15 days	None	Every day	Once a month	None	3	8	4	6	4	25	4	7	5	2	5	7	1	6	2	7
407	Male	183	75	23	No	No	1	1	1	1	1	1	1	1	1	1	1	1	1	1	1	Type 4	Every day	1-2 times a week	1-2 times a week	5-6 times a week	Once a month	Once a month	5-6 times a week	Once a month	None	2	3	3	4	3	15	1	4	4	2	6	6	2	6	2	7
408	Female	160	54	18	No	No	1	1	1	1	1	2	1	1	1	1	1	1	1	1	1	Type 3	1-2 times a week	None	1-2 times a week	5-6 times a week	Once a month	Once a month	5-6 times a week	Once a month	None	2	3	3	5	3	16	4	7	4	2	6	6	2	6	2	7
409	Female	160	59	19	No	No	3	2	1	1	1	2	2	1	1	1	3	1	1	2	2	Type 4	3-4 times a week	None	Once in 15 days	1-2 times a week	Once a month	Once in 15 days	3-4 times a week	Once a month	None	3	5	6	6	4	24	3	7	5	4	6	5	3	6	2	7
410	Female	169	74	20	No	No	1	1	1	1	4	2	3	1	1	1	1	1	1	1	2	Type 4	Every day	None	Once in 15 days	3-4 times a week	3-4 times a week	5-6 times a week	1-2 times a week	Once a month	None	2	6	3	7	4	22	1	7	5	3	3	2	4	6	2	7
411	Female	169	51	20	No	No	2	1	1	2	1	1	1	1	1	1	2	1	1	3	1	Type 4	5-6 times a week	Once in 15 days	Once in 15 days	Every day	Once a month	Once a month	1-2 times a week	Once a month	None	2	5	6	4	3	20	2	5	5	1	6	6	4	6	2	7
412	Female	162	80	21	No	No	2	2	2	1	1	1	2	1	1	1	1	1	1	1	1	Type 3	1-2 times a week	None	Once a month	3-4 times a week	5-6 times a week	Once in 15 days	Once in 15 days	Once a month	None	4	4	3	5	3	19	4	7	6	3	2	5	5	6	2	7
413	Male	160	80	26	No	No	1	1	1	1	1	3	4	1	3	1	1	1	1	1	1	Type 4	1-2 times a week	None	3-4 times a week	Every day	3-4 times a week	Once a month	Once in 15 days	Once a month	None	2	3	3	11	3	22	4	7	3	1	3	6	5	6	2	7
414	Female	159	50	27	No	No	1	1	1	2	1	2	1	1	1	1	1	1	1	1	1	Type 4	3-4 times a week	None	Once in 15 days	3-4 times a week	Once in 15 days	5-6 times a week	None	Once a month	None	2	4	3	5	3	17	3	7	5	3	5	2	7	6	2	7
415	Female	155	53	22	No	No	2	2	1	2	1	2	2	1	1	1	1	1	1	1	1	Type 4	3-4 times a week	5-6 times a week	1-2 times a week	None	Every day	1-2 times a week	None	Once a month	None	3	5	3	6	3	20	3	2	4	7	1	4	7	6	2	7
416	Female	165	53	20	Yes	Yes	2	2	2	3	1	3	2	2	2	1	3	1	1	3	1	Type 3	1-2 times a week	None	1-2 times a week	Once in 15 days	3-4 times a week	1-2 times a week	None	Once a month	None	4	6	7	9	3	29	4	7	4	5	3	4	7	6	2	7
417	Female	156	56	18	No	No	2	1	3	3	1	2	6	3	4	1	4	1	2	3	3	Type 3	Every day	Once in 15 days	1-2 times a week	3-4 times a week	1-2 times a week	1-2 times a week	None	Once a month	None	4	6	8	15	6	39	1	5	4	3	4	4	7	6	2	7
418	Male	176	71	20	No	Yes	1	2	1	1	1	3	2	1	1	1	1	1	1	1	1	Type 3	1-2 times a week	None	3-4 times a week	None	Once in 15 days	1-2 times a week	None	Once a month	None	3	3	3	7	3	19	4	7	3	7	5	4	7	6	2	7
419	Female	165	59	21	Yes	No	2	2	1	2	2	2	2	2	1	1	1	1	1	2	2	Type 4	None	None	None	None	None	Every day	Every day	None	None	3	6	4	7	4	24	7	7	7	7	7	1	1	7	2	7
420	Female	159	57	20	No	No	1	1	1	1	1	2	1	1	1	1	1	2	2	1	1	Type 3	5-6 times a week	None	1-2 times a week	Every day	Every day	5-6 times a week	Every day	None	None	2	3	4	5	4	18	2	7	4	1	1	2	1	7	2	7
421	Female	179	65	21	No	No	3	1	1	3	1	4	3	3	3	1	1	1	1	2	2	Type 3	5-6 times a week	None	Once in 15 days	Every day	Every day	5-6 times a week	Every day	None	None	2	7	4	13	4	30	2	7	5	1	1	2	1	7	2	7
422	Female	169	75	19	Yes	No	7	7	7	7	7	7	7	7	7	7	7	7	7	7	1	Type 4	Every day	Once a month	5-6 times a week	Every day	None	5-6 times a week	Every day	None	None	14	21	21	28	15	99	1	6	2	1	7	2	1	7	2	7
423	Female	171	57	21	Yes	Yes	1	1	1	1	1	1	1	1	1	2	1	1	2	1	2	Type 4	5-6 times a week	None	Once in 15 days	Every day	None	5-6 times a week	Every day	None	None	2	3	3	4	6	18	2	7	5	1	7	2	1	7	2	7
424	Female	181	56	23	No	No	1	1	1	3	1	3	1	2	1	1	1	1	1	2	1	Type 4	3-4 times a week	None	3-4 times a week	Every day	Every day	3-4 times a week	Every day	None	None	2	5	4	7	3	21	3	7	3	1	1	3	1	7	2	7
425	Female	179	68	25	No	No	1	5	5	1	1	1	1	1	1	1	1	1	1	1	1	Type 4	Every day	None	Once in 15 days	Every day	Every day	3-4 times a week	Every day	None	None	10	3	3	4	3	23	1	7	5	1	1	3	1	7	2	7
426	Female	163	54	19	No	No	7	7	7	4	6	6	7	5	6	1	7	6	1	7	7	Type 4	5-6 times a week	1-2 times a week	Every day	Every day	Every day	1-2 times a week	Every day	None	None	14	17	20	24	9	84	2	4	1	1	1	4	1	7	2	7
427	Female	170	65	19	No	No	1	1	4	4	1	4	2	2	3	1	1	1	1	2	2	Type 4	3-4 times a week	None	1-2 times a week	Every day	Every day	1-2 times a week	Every day	None	None	5	6	4	11	4	30	3	7	4	1	1	4	1	7	2	7
428	Female	160	56	23	No	Yes	2	2	1	3	2	3	5	1	3	4	3	2	3	3	5	Type 3	1-2 times a week	None	1-2 times a week	Every day	Every day	1-2 times a week	Every day	None	None	3	7	8	12	12	42	4	7	4	1	1	4	1	7	2	7
429	Male	179	80	18	Yes	No	2	2	2	2	2	2	1	2	1	1	1	1	1	1	2	Type 4	1-2 times a week	1-2 times a week	3-4 times a week	5-6 times a week	5-6 times a week	1-2 times a week	Every day	None	None	4	6	3	6	4	23	4	4	3	2	2	4	1	7	2	7
430	Female	170	51	21	No	Yes	1	1	1	2	2	1	4	1	1	2	1	1	1	1	1	Type 3	1-2 times a week	None	1-2 times a week	Every day	3-4 times a week	1-2 times a week	Every day	None	None	2	5	3	7	4	21	4	7	4	1	3	4	1	7	2	7
431	Female	162	59	23	Yes	Yes	4	3	5	5	4	7	7	5	6	4	5	7	7	5	6	Type 3	Once in 15 days	None	Once a month	5-6 times a week	1-2 times a week	1-2 times a week	Every day	None	None	8	13	17	25	17	80	5	7	6	2	4	4	1	7	2	7
432	Female	162	54	18	No	No	4	1	1	1	4	1	4	1	1	4	1	4	1	4	4	Type 3	1-2 times a week	None	1-2 times a week	Every day	None	1-2 times a week	Every day	None	None	2	9	9	7	9	36	4	7	4	1	7	4	1	7	2	7
433	Female	162	53	19	No	No	6	6	6	1	3	4	4	4	4	1	4	4	1	5	1	Type 3	1-2 times a week	None	1-2 times a week	Every day	Every day	Once in 15 days	Every day	None	None	12	10	13	16	3	54	4	7	4	1	1	5	1	7	2	7
434	Male	180	67	21	No	No	2	2	1	3	2	3	4	3	3	3	1	1	2	4	4	Type 3	3-4 times a week	Once a month	Every day	5-6 times a week	1-2 times a week	Once in 15 days	Every day	None	None	3	7	6	13	9	38	3	6	1	2	4	5	1	7	2	7
435	Female	149	45	18	No	Yes	1	1	1	1	1	2	1	1	1	1	1	1	1	2	2	Type 3	5-6 times a week	Once a month	1-2 times a week	Every day	Once in 15 days	Once in 15 days	Every day	None	None	2	3	4	5	4	18	2	6	4	1	5	5	1	7	2	7
436	Female	168	55	19	No	No	6	3	2	1	3	2	3	1	1	1	7	2	1	7	2	Type 4	3-4 times a week	None	1-2 times a week	None	Once a month	Once in 15 days	Every day	None	None	5	10	16	7	4	42	3	7	4	7	6	5	1	7	2	7
437	Female	162	60	23	No	No	1	1	1	1	1	1	1	1	1	1	2	2	1	1	1	Type 4	1-2 times a week	Once a month	1-2 times a week	Every day	3-4 times a week	Once a month	Every day	None	None	2	3	5	4	3	17	4	6	4	1	3	6	1	7	2	7
438	Female	152	55	24	No	No	1	1	1	7	1	7	7	6	1	1	1	1	7	7	6	Type 4	1-2 times a week	1-2 times a week	1-2 times a week	Every day	Once a month	Once a month	Every day	None	None	2	9	9	21	14	55	4	4	4	1	6	6	1	7	2	7
439	Female	167	60	18	No	Yes	1	1	1	6	1	4	2	1	1	1	1	1	1	1	4	Type 4	Once in 15 days	Every day	Once a month	Once a month	None	None	Every day	None	None	2	8	3	8	6	27	5	1	6	6	7	7	1	7	2	7
440	Female	162	70	19	Yes	No	1	2	1	3	1	3	3	1	1	1	1	1	1	1	1	Type 4	Once in 15 days	Once a month	Every day	Every day	Every day	Every day	5-6 times a week	None	None	3	5	3	8	3	22	5	6	1	1	1	1	2	7	2	7
441	Female	159	55	18	No	No	3	2	1	5	3	1	3	1	7	1	2	2	1	2	1	Type 4	Once in 15 days	Once in 15 days	None	Every day	Every day	Every day	5-6 times a week	None	None	3	11	6	12	3	35	5	5	7	1	1	1	2	7	2	7
442	Female	154	47	20	No	No	1	1	1	4	3	4	4	2	2	1	1	1	2	1	1	Type 4	1-2 times a week	5-6 times a week	3-4 times a week	1-2 times a week	1-2 times a week	5-6 times a week	5-6 times a week	None	None	2	8	3	12	4	29	4	2	3	4	4	2	2	7	2	7
443	Male	160	59	43	No	Yes	1	1	1	1	1	1	1	1	1	1	1	1	1	1	1	Type 4	5-6 times a week	Once in 15 days	1-2 times a week	3-4 times a week	1-2 times a week	3-4 times a week	5-6 times a week	None	None	2	3	3	4	3	15	2	5	4	3	4	3	2	7	2	7
444	Female	165	63	18	No	No	2	2	5	2	1	4	4	4	4	1	1	1	1	5	5	Type 4	1-2 times a week	None	None	1-2 times a week	None	1-2 times a week	5-6 times a week	None	None	7	5	7	16	7	42	4	7	7	4	7	4	2	7	2	7
445	Female	160	68	19	No	No	2	3	2	6	1	6	7	1	1	1	1	1	1	1	1	Type 4	Once in 15 days	1-2 times a week	1-2 times a week	5-6 times a week	5-6 times a week	Once in 15 days	5-6 times a week	None	None	5	9	3	15	3	35	5	4	4	2	2	5	2	7	2	7
446	Male	179	76	21	No	Yes	2	1	1	1	1	2	2	2	2	2	1	1	1	2	2	Type 3	Once in 15 days	None	Once in 15 days	3-4 times a week	3-4 times a week	Once in 15 days	5-6 times a week	None	None	2	4	4	8	5	23	5	7	5	3	3	5	2	7	2	7
447	Female	177	51	21	No	No	1	1	1	1	1	3	1	1	1	1	1	1	1	1	1	Type 4	3-4 times a week	Once a month	Once in 15 days	5-6 times a week	5-6 times a week	Once a month	5-6 times a week	None	None	2	3	3	6	3	17	3	6	5	2	2	6	2	7	2	7
448	Female	162	73	25	No	Yes	3	5	4	2	1	3	6	2	7	1	2	2	1	1	4	Type 3	Once a month	None	None	3-4 times a week	3-4 times a week	Once a month	5-6 times a week	None	None	9	6	5	18	6	44	6	7	7	3	3	6	2	7	2	7
449	Female	170	48	19	No	No	1	1	1	2	1	5	1	1	7	1	1	1	1	1	1	Type 4	5-6 times a week	None	Once a month	3-4 times a week	1-2 times a week	Once a month	5-6 times a week	None	None	2	4	3	14	3	26	2	7	6	3	4	6	2	7	2	7
450	Female	160	52	20	No	No	2	2	1	2	1	2	3	2	2	1	1	1	1	2	1	Type 3	3-4 times a week	None	Once a month	Every day	5-6 times a week	None	5-6 times a week	None	None	3	5	4	9	3	24	3	7	6	1	2	7	2	7	2	7
451	Female	175	55	19	No	Yes	2	1	2	2	1	1	3	6	3	2	1	1	1	4	1	Type 3	1-2 times a week	Once a month	1-2 times a week	3-4 times a week	5-6 times a week	5-6 times a week	3-4 times a week	None	None	3	5	6	13	4	31	4	6	4	3	2	2	3	7	2	7
452	Female	164	54	20	No	No	7	7	7	7	7	7	6	5	5	5	7	7	1	7	2	Type 4	Every day	None	1-2 times a week	5-6 times a week	Once in 15 days	3-4 times a week	3-4 times a week	None	None	14	21	21	23	8	87	1	7	4	2	5	3	3	7	2	7
453	Female	167	52	21	Yes	Yes	5	1	1	7	5	7	2	1	1	7	1	1	7	1	7	Type 3	3-4 times a week	None	Once a month	3-4 times a week	None	3-4 times a week	3-4 times a week	None	None	2	17	3	11	21	54	3	7	6	3	7	3	3	7	2	7
454	Female	166	59	22	No	Yes	3	3	2	2	1	1	2	1	2	2	1	1	1	1	1	Type 3	3-4 times a week	3-4 times a week	3-4 times a week	Every day	5-6 times a week	1-2 times a week	3-4 times a week	None	None	5	6	3	6	4	24	3	3	3	1	2	4	3	7	2	7
455	Female	179	78	39	No	No	3	3	3	3	1	2	4	1	7	7	1	1	7	7	7	Type 4	1-2 times a week	Once a month	3-4 times a week	5-6 times a week	1-2 times a week	1-2 times a week	3-4 times a week	None	None	6	7	9	14	21	57	4	6	3	2	4	4	3	7	2	7
456	Female	171	53	21	No	No	1	1	2	2	2	1	2	1	1	1	1	1	1	1	2	Type 4	3-4 times a week	1-2 times a week	1-2 times a week	5-6 times a week	1-2 times a week	1-2 times a week	3-4 times a week	None	None	3	5	3	5	4	20	3	4	4	2	4	4	3	7	2	7
457	Female	173	56	19	No	Yes	1	2	1	2	1	2	1	1	1	1	1	1	1	1	3	Type 4	3-4 times a week	None	3-4 times a week	1-2 times a week	1-2 times a week	1-2 times a week	3-4 times a week	None	None	3	4	3	5	5	20	3	7	3	4	4	4	3	7	2	7
458	Female	169	49	21	No	Yes	1	1	1	2	1	3	3	3	3	3	4	3	1	4	2	Type 3	3-4 times a week	None	3-4 times a week	5-6 times a week	5-6 times a week	Once in 15 days	3-4 times a week	None	None	2	4	11	12	6	35	3	7	3	2	2	5	3	7	2	7
459	Female	173	67	19	Yes	No	5	5	3	1	5	4	2	2	4	1	1	1	3	4	3	Type 3	1-2 times a week	None	1-2 times a week	3-4 times a week	3-4 times a week	Once in 15 days	3-4 times a week	None	None	8	11	6	12	7	44	4	7	4	3	3	5	3	7	2	7
460	Female	162	55	22	No	No	3	1	1	2	1	1	1	1	1	1	1	1	1	1	1	Type 4	3-4 times a week	3-4 times a week	1-2 times a week	3-4 times a week	Once a month	Once in 15 days	3-4 times a week	None	None	2	6	3	4	3	18	3	3	4	3	6	5	3	7	2	7
461	Female	182	57	19	No	No	1	1	1	3	1	3	3	3	3	1	1	1	1	6	1	Type 4	Every day	1-2 times a week	Once a month	5-6 times a week	Once in 15 days	Once a month	3-4 times a week	None	None	2	5	8	12	3	30	1	4	6	2	5	6	3	7	2	7
462	Male	185	78	25	Yes	Yes	1	1	1	1	1	6	5	7	5	1	1	1	1	1	3	Type 4	Once in 15 days	None	3-4 times a week	3-4 times a week	Once in 15 days	Once a month	3-4 times a week	None	None	2	3	3	23	5	36	5	7	3	3	5	6	3	7	2	7
463	Female	157	59	25	No	No	1	5	1	4	1	6	1	1	3	1	1	1	1	1	1	Type 3	1-2 times a week	None	3-4 times a week	5-6 times a week	Once a month	None	3-4 times a week	None	None	6	6	3	11	3	29	4	7	3	2	6	7	3	7	2	7
464	Female	159	52	18	No	No	4	1	1	4	4	4	4	4	1	1	1	1	1	1	1	Type 4	3-4 times a week	Once in 15 days	Once in 15 days	5-6 times a week	3-4 times a week	3-4 times a week	1-2 times a week	None	None	2	12	3	13	3	33	3	5	5	2	3	3	4	7	2	7
465	Female	160	53	21	No	No	6	7	5	7	2	7	2	1	3	1	2	1	2	1	5	Type 4	3-4 times a week	None	1-2 times a week	None	None	3-4 times a week	1-2 times a week	None	None	12	15	4	13	8	52	3	7	4	7	7	3	4	7	2	7
466	Female	163	57	20	No	No	4	4	1	1	3	3	3	4	4	1	1	1	1	1	1	Type 4	5-6 times a week	1-2 times a week	1-2 times a week	5-6 times a week	3-4 times a week	Once in 15 days	1-2 times a week	None	None	5	8	3	14	3	33	2	4	4	2	3	5	4	7	2	7
467	Female	179	53	22	No	No	2	1	1	1	1	5	1	1	6	1	1	1	1	1	1	Type 3	1-2 times a week	None	Once a month	3-4 times a week	Once in 15 days	Once in 15 days	1-2 times a week	None	None	2	4	3	13	3	25	4	7	6	3	5	5	4	7	2	7
468	Female	171	68	23	No	No	1	1	1	1	1	1	1	1	1	1	1	1	1	1	1	Type 4	5-6 times a week	1-2 times a week	Once a month	Every day	Once a month	Once in 15 days	1-2 times a week	None	None	2	3	3	4	3	15	2	4	6	1	6	5	4	7	2	7
469	Female	169	59	22	No	No	5	5	5	4	3	4	7	6	6	6	2	1	1	3	4	Type 4	Every day	1-2 times a week	Once in 15 days	Every day	Every day	Once a month	1-2 times a week	None	None	10	12	6	23	11	62	1	4	5	1	1	6	4	7	2	7
470	Male	175	61	25	Yes	Yes	2	1	1	2	1	2	2	2	2	1	1	1	1	1	2	Type 4	Once in 15 days	None	1-2 times a week	1-2 times a week	1-2 times a week	Once a month	1-2 times a week	None	None	2	5	3	8	4	22	5	7	4	4	4	6	4	7	2	7
471	Female	162	52	23	No	Yes	2	1	1	3	1	3	2	2	3	1	2	2	1	1	1	Type 3	Once in 15 days	None	Once a month	1-2 times a week	Once a month	Once a month	1-2 times a week	None	None	2	6	5	10	3	26	5	7	6	4	6	6	4	7	2	7
472	Female	156	73	37	No	Yes	1	3	2	1	1	2	4	2	1	1	1	1	2	3	3	Type 4	5-6 times a week	None	Once in 15 days	1-2 times a week	None	Once a month	1-2 times a week	None	None	5	3	5	9	6	28	2	7	5	4	7	6	4	7	2	7
473	Female	159	78	18	No	Yes	1	1	1	2	1	2	2	1	2	1	1	1	1	1	1	Type 3	Once in 15 days	None	1-2 times a week	1-2 times a week	1-2 times a week	None	1-2 times a week	None	None	2	4	3	7	3	19	5	7	4	4	4	7	4	7	2	7
474	Male	170	70	20	No	Yes	1	1	1	1	1	2	1	1	1	1	1	1	1	1	1	Type 3	1-2 times a week	None	1-2 times a week	Every day	None	None	1-2 times a week	None	None	2	3	3	5	3	16	4	7	4	1	7	7	4	7	2	7
475	Female	168	61	20	No	No	2	1	1	1	2	2	1	2	2	1	1	1	1	1	1	Type 4	1-2 times a week	None	1-2 times a week	1-2 times a week	1-2 times a week	3-4 times a week	Once in 15 days	None	None	2	5	3	7	3	20	4	7	4	4	4	3	5	7	2	7
476	Female	176	70	22	Yes	Yes	6	1	1	1	2	5	7	1	1	1	1	1	1	1	1	Type 4	1-2 times a week	None	Once in 15 days	None	3-4 times a week	1-2 times a week	Once in 15 days	None	None	2	9	3	14	3	31	4	7	5	7	3	4	5	7	2	7
477	Female	167	56	18	Yes	Yes	1	1	1	1	1	2	1	1	1	1	1	1	1	1	1	Type 3	Once in 15 days	None	Once a month	1-2 times a week	1-2 times a week	1-2 times a week	Once in 15 days	None	None	2	3	3	5	3	16	5	7	6	4	4	4	5	7	2	7
478	Female	161	59	25	Yes	Yes	1	1	2	1	4	4	6	1	2	3	1	1	1	3	3	Type 3	1-2 times a week	None	3-4 times a week	1-2 times a week	Once in 15 days	1-2 times a week	Once in 15 days	None	None	3	6	5	13	7	34	4	7	3	4	5	4	5	7	2	7
479	Female	157	57	19	No	No	4	1	1	5	1	7	7	6	2	1	1	1	1	1	1	Type 4	1-2 times a week	None	1-2 times a week	5-6 times a week	None	1-2 times a week	Once in 15 days	None	None	2	10	3	22	3	40	4	7	4	2	7	4	5	7	2	7
480	Male	171	72	21	No	Yes	5	4	3	4	4	6	6	5	7	6	1	1	2	1	2	Type 3	5-6 times a week	1-2 times a week	None	3-4 times a week	5-6 times a week	Once in 15 days	Once in 15 days	None	None	7	13	3	24	10	57	2	4	7	3	2	5	5	7	2	7
481	Female	158	55	20	No	Yes	1	1	1	3	1	3	1	1	3	1	3	3	1	1	1	Type 3	3-4 times a week	None	Once in 15 days	1-2 times a week	3-4 times a week	Once in 15 days	Once in 15 days	None	None	2	5	7	8	3	25	3	7	5	4	3	5	5	7	2	7
482	Female	162	60	18	No	No	2	1	2	3	1	7	1	1	3	1	2	2	1	2	1	Type 4	1-2 times a week	None	1-2 times a week	3-4 times a week	1-2 times a week	Once in 15 days	Once in 15 days	None	None	3	6	6	12	3	30	4	7	4	3	4	5	5	7	2	7
483	Female	155	59	24	No	Yes	1	3	3	2	2	2	3	2	3	4	4	4	4	2	2	Type 4	5-6 times a week	1-2 times a week	3-4 times a week	1-2 times a week	1-2 times a week	Once in 15 days	Once in 15 days	None	None	6	5	10	10	10	41	2	4	3	4	4	5	5	7	2	7
484	Female	152	51	19	No	No	5	2	1	3	1	3	3	1	3	2	1	1	1	1	1	Type 4	3-4 times a week	Once a month	Once in 15 days	Once in 15 days	None	Once in 15 days	Once in 15 days	None	None	3	9	3	10	4	29	3	6	5	5	7	5	5	7	2	7
485	Female	162	61	18	No	Yes	5	1	1	1	1	7	7	2	3	1	1	1	1	1	3	Type 3	1-2 times a week	None	Once in 15 days	Once in 15 days	1-2 times a week	Once a month	Once in 15 days	None	None	2	7	3	19	5	36	4	7	5	5	4	6	5	7	2	7
486	Female	154	53	27	No	Yes	1	1	1	1	1	1	1	1	1	1	1	1	1	1	1	Type 4	Every day	None	5-6 times a week	Once a month	Once a month	Once a month	Once in 15 days	None	None	2	3	3	4	3	15	1	7	2	6	6	6	5	7	2	7
487	Female	156	52	21	No	No	1	6	6	1	5	1	5	1	1	1	1	1	1	1	1	Type 4	5-6 times a week	None	1-2 times a week	Once a month	Once a month	3-4 times a week	Once a month	None	None	12	7	3	8	3	33	2	7	4	6	6	3	6	7	2	7
488	Female	159	61	18	Yes	Yes	1	2	1	1	1	2	2	1	1	1	2	1	1	2	1	Type 4	1-2 times a week	None	Once in 15 days	1-2 times a week	3-4 times a week	1-2 times a week	Once a month	None	None	3	3	5	6	3	20	4	7	5	4	3	4	6	7	2	7
489	Female	162	53	18	No	No	4	1	7	2	1	5	7	7	6	1	1	1	1	6	5	Type 3	Every day	None	Once a month	Every day	1-2 times a week	Once a month	Once a month	None	None	8	7	8	25	7	55	1	7	6	1	4	6	6	7	2	7
490	Female	169	65	19	No	No	1	1	1	1	2	2	1	1	1	1	1	1	1	1	1	Type 4	Once in 15 days	None	Once in 15 days	1-2 times a week	Once in 15 days	Once a month	Once a month	None	None	2	4	3	5	3	17	5	7	5	4	5	6	6	7	2	7
491	Male	198	75	18	No	Yes	1	1	1	2	2	2	2	1	2	1	1	1	1	1	2	Type 3	3-4 times a week	Every day	Once a month	Every day	None	Once a month	Once a month	None	None	2	5	3	7	4	21	3	1	6	1	7	6	6	7	2	7
492	Male	160	54	23	No	Yes	1	4	2	7	7	2	7	7	7	7	1	1	3	7	7	Type 3	Every day	Once a month	1-2 times a week	Every day	Every day	Every day	None	None	None	6	15	9	23	17	70	1	6	4	1	1	1	7	7	2	7
493	Female	165	57	20	No	No	1	1	1	1	1	3	2	1	1	1	1	1	1	1	1	Type 3	1-2 times a week	None	1-2 times a week	1-2 times a week	1-2 times a week	3-4 times a week	None	None	None	2	3	3	7	3	18	4	7	4	4	4	3	7	7	2	7
494	Female	158	77	18	No	No	1	1	2	4	1	3	4	2	1	1	1	1	1	4	3	Type 4	5-6 times a week	None	1-2 times a week	3-4 times a week	3-4 times a week	1-2 times a week	None	None	None	3	6	6	10	5	30	2	7	4	3	3	4	7	7	2	7
495	Female	165	55	20	Yes	Yes	1	1	1	3	1	3	2	1	1	1	1	1	1	1	4	Type 3	1-2 times a week	Once a month	3-4 times a week	1-2 times a week	Once in 15 days	1-2 times a week	None	None	None	2	5	3	7	6	23	4	6	3	4	5	4	7	7	2	7
496	Female	164	65	22	No	No	1	5	1	1	1	2	4	1	2	1	1	1	1	2	2	Type 4	3-4 times a week	None	3-4 times a week	3-4 times a week	None	1-2 times a week	None	None	None	6	3	4	9	4	26	3	7	3	3	7	4	7	7	2	7
497	Female	171	52	21	No	No	4	2	1	1	3	3	3	1	4	4	1	1	1	1	3	Type 4	1-2 times a week	Once a month	3-4 times a week	5-6 times a week	5-6 times a week	Once in 15 days	None	None	None	3	8	3	11	8	33	4	6	3	2	2	5	7	7	2	7
498	Female	159	60	18	No	No	2	1	1	1	2	2	2	1	1	1	1	1	1	2	2	Type 4	5-6 times a week	None	Once a month	Once in 15 days	3-4 times a week	Once in 15 days	None	None	None	2	5	4	6	4	21	2	7	6	5	3	5	7	7	2	7
499	Female	155	74	18	No	No	2	1	1	1	1	2	2	1	1	1	1	1	1	1	1	Type 3	1-2 times a week	None	Once a month	1-2 times a week	1-2 times a week	Once in 15 days	None	None	None	2	4	3	6	3	18	4	7	6	4	4	5	7	7	2	7
500	Female	154	67	18	No	Yes	1	5	7	7	7	7	3	1	1	1	1	1	1	1	6	Type 3	Every day	Once a month	1-2 times a week	3-4 times a week	Once in 15 days	Once in 15 days	None	None	None	12	15	3	12	8	50	1	6	4	3	5	5	7	7	2	7
501	Male	168	48	20	No	Yes	5	1	1	5	2	1	1	2	6	1	7	6	1	7	5	Type 4	1-2 times a week	Once a month	1-2 times a week	1-2 times a week	Once in 15 days	Once in 15 days	None	None	None	2	12	20	10	7	51	4	6	4	4	5	5	7	7	2	7
502	Male	182	78	22	No	No	1	3	1	2	1	2	3	1	1	1	1	1	1	1	1	Type 3	Once in 15 days	None	Once in 15 days	1-2 times a week	Once in 15 days	Once in 15 days	None	None	None	4	4	3	7	3	21	5	7	5	4	5	5	7	7	2	7
503	Female	155	50	21	No	No	2	2	2	1	1	2	1	1	2	1	1	1	2	2	2	Type 3	None	None	None	None	None	Once in 15 days	None	None	None	4	4	4	6	5	23	7	7	7	7	7	5	7	7	2	7
504	Female	153	56	18	No	Yes	5	1	1	6	6	6	7	1	1	1	1	1	1	1	1	Type 3	Every day	None	None	Once in 15 days	3-4 times a week	Once a month	None	None	None	2	17	3	15	3	40	1	7	7	5	3	6	7	7	2	7
505	Female	173	58	19	No	Yes	4	1	1	4	4	6	1	1	1	1	1	1	1	4	1	Type 3	1-2 times a week	None	Once a month	Once in 15 days	1-2 times a week	Once a month	None	None	None	2	12	6	9	3	32	4	7	6	5	4	6	7	7	2	7
506	Male	165	63	18	No	No	1	1	1	1	1	1	1	1	1	1	1	1	1	1	1	Type 3	1-2 times a week	None	1-2 times a week	Every day	Every day	None	None	None	None	2	3	3	4	3	15	4	7	4	1	1	7	7	7	2	7
507	Female	176	68	21	No	No	1	1	1	2	1	5	5	4	2	1	2	1	1	2	2	Type 4	5-6 times a week	None	1-2 times a week	1-2 times a week	Every day	None	None	None	None	2	4	5	16	4	31	2	7	4	4	1	7	7	7	2	7
508	Female	179	85	18	No	No	1	2	1	1	1	3	3	1	3	1	1	1	1	1	3	Type 4	3-4 times a week	Once a month	1-2 times a week	1-2 times a week	5-6 times a week	None	None	None	None	3	3	3	10	5	24	3	6	4	4	2	7	7	7	2	7
509	Female	162	65	23	Yes	Yes	1	7	1	1	6	5	1	1	3	1	1	1	1	2	5	Type 3	5-6 times a week	5-6 times a week	1-2 times a week	3-4 times a week	1-2 times a week	None	None	None	None	8	8	4	10	7	37	2	2	4	3	4	7	7	7	2	7
510	Female	171	59	18	Yes	Yes	1	3	1	3	1	3	5	1	1	1	3	1	1	1	5	Type 4	None	None	None	None	1-2 times a week	None	None	None	None	4	5	5	10	7	31	7	7	7	7	4	7	7	7	2	7
511	Female	160	60	20	No	No	2	1	1	6	1	6	1	1	1	1	1	1	1	1	1	Type 4	5-6 times a week	Once a month	1-2 times a week	Once in 15 days	Once a month	None	None	None	None	2	9	3	9	3	26	2	6	4	5	6	7	7	7	2	7
512	Female	162	74	21	No	No	6	6	6	6	3	6	6	6	5	5	5	5	5	6	5	Type 3	3-4 times a week	None	3-4 times a week	Once in 15 days	None	None	None	None	None	12	15	16	23	15	81	3	7	3	5	7	7	7	7	2	7
513	Female	162	55	19	No	No	1	1	1	1	1	1	1	1	1	1	1	1	1	1	1	Type 4	1-2 times a week	None	None	None	None	None	None	None	None	2	3	3	4	3	15	4	7	7	7	7	7	7	7	2	7
514	Female	169	72	19	No	No	2	1	1	2	1	2	2	2	2	1	2	1	1	2	1	Type 5	Every day	None	1-2 times a week	Every day	Every day	1-2 times a week	Every day	Every day	None	2	5	5	8	3	23	1	7	4	1	1	4	1	1	3	7
515	Female	162	72	23	No	Yes	2	3	1	2	1	2	3	1	1	1	1	1	1	1	2	Type 5	Every day	None	Once in 15 days	Every day	Every day	Once in 15 days	Every day	Every day	None	4	5	3	7	4	23	1	7	5	1	1	5	1	1	3	7
516	Female	181	68	23	Yes	No	3	3	1	3	1	2	3	3	3	1	3	2	1	3	1	Type 6	1-2 times a week	Once in 15 days	Once in 15 days	Every day	Every day	Once in 15 days	Once a month	Every day	None	4	7	8	11	3	33	4	5	5	1	1	5	6	1	3	7
517	Female	170	55	22	No	No	6	7	7	7	7	7	7	7	7	3	7	7	1	7	7	Type 6	5-6 times a week	None	5-6 times a week	5-6 times a week	5-6 times a week	Once a month	5-6 times a week	5-6 times a week	None	14	20	21	28	11	94	2	7	2	2	2	6	2	2	3	7
518	Female	160	60	21	No	Yes	1	2	1	1	1	3	2	2	3	2	1	1	1	2	4	Type 5	1-2 times a week	Once in 15 days	1-2 times a week	Once a month	3-4 times a week	Once in 15 days	None	5-6 times a week	None	3	3	4	10	7	27	4	5	4	6	3	5	7	2	3	7
519	Female	160	58	25	Yes	Yes	3	1	1	4	2	4	4	3	5	1	2	2	1	2	1	Type 5	3-4 times a week	None	Once in 15 days	None	3-4 times a week	Once in 15 days	None	3-4 times a week	None	2	9	6	16	3	36	3	7	5	7	3	5	7	3	3	7
520	Female	177	64	19	No	No	4	1	1	4	1	4	4	1	2	1	1	2	1	1	2	Type 5	3-4 times a week	None	1-2 times a week	5-6 times a week	5-6 times a week	1-2 times a week	5-6 times a week	1-2 times a week	None	2	9	4	11	4	30	3	7	4	2	2	4	2	4	3	7
521	Female	162	59	21	No	No	1	1	2	7	1	5	5	3	1	3	1	1	1	1	1	Type 5	5-6 times a week	Once a month	3-4 times a week	5-6 times a week	3-4 times a week	3-4 times a week	3-4 times a week	1-2 times a week	None	3	9	3	14	5	34	2	6	3	2	3	3	3	4	3	7
522	Female	162	56	22	Yes	Yes	6	3	1	5	6	5	6	4	6	4	5	5	2	1	3	Type 5	1-2 times a week	Once a month	1-2 times a week	5-6 times a week	1-2 times a week	1-2 times a week	1-2 times a week	1-2 times a week	None	4	17	11	21	9	62	4	6	4	2	4	4	4	4	3	7
523	Female	159	52	21	Yes	Yes	1	1	2	1	2	2	2	1	2	1	2	2	1	2	2	Type 6	3-4 times a week	None	3-4 times a week	Every day	1-2 times a week	None	5-6 times a week	Once in 15 days	None	3	4	6	7	4	24	3	7	3	1	4	7	2	5	3	7
524	Female	178	63	22	No	No	2	2	2	3	2	3	3	1	1	2	1	1	2	2	2	Type 5	1-2 times a week	Once in 15 days	3-4 times a week	5-6 times a week	5-6 times a week	1-2 times a week	1-2 times a week	Once in 15 days	None	4	7	4	8	6	29	4	5	3	2	2	4	4	5	3	7
525	Female	176	63	22	No	No	1	4	1	1	4	4	5	1	3	1	3	3	1	4	1	Type 5	5-6 times a week	Once a month	1-2 times a week	Once a month	1-2 times a week	Once in 15 days	Once in 15 days	Once in 15 days	None	5	6	10	13	3	37	2	6	4	6	4	5	5	5	3	7
526	Female	167	71	21	No	Yes	4	1	1	3	1	4	1	1	3	1	1	1	1	4	2	Type 5	1-2 times a week	None	Once in 15 days	1-2 times a week	None	None	Once in 15 days	Once in 15 days	None	2	8	6	9	4	29	4	7	5	4	7	7	5	5	3	7
527	Female	159	60	22	No	No	5	4	4	4	3	4	4	5	5	1	6	5	1	6	7	Type 6	Every day	None	1-2 times a week	Every day	Every day	Once a month	None	Once in 15 days	None	8	12	17	18	9	64	1	7	4	1	1	6	7	5	3	7
528	Male	178	89	18	No	Yes	1	1	1	2	1	5	2	1	3	1	2	2	1	3	1	Type 5	3-4 times a week	None	3-4 times a week	None	3-4 times a week	1-2 times a week	None	Once a month	None	2	4	7	11	3	27	3	7	3	7	3	4	7	6	3	7
529	Female	165	67	24	Yes	No	1	2	1	2	2	2	1	1	1	1	1	1	1	1	1	Type 5	1-2 times a week	1-2 times a week	3-4 times a week	Every day	Every day	Every day	Every day	None	None	3	5	3	5	3	19	4	4	3	1	1	1	1	7	3	7
530	Male	177	70	24	No	No	1	2	1	2	1	2	2	1	2	2	1	1	1	1	1	Type 5	1-2 times a week	1-2 times a week	1-2 times a week	Every day	3-4 times a week	5-6 times a week	Every day	None	None	3	4	3	7	4	21	4	4	4	1	3	2	1	7	3	7
531	Female	160	63	20	No	No	3	1	1	6	1	6	6	6	4	1	4	5	1	6	4	Type 6	5-6 times a week	None	1-2 times a week	Every day	None	1-2 times a week	Every day	None	None	2	10	15	22	6	55	2	7	4	1	7	4	1	7	3	7
532	Female	160	70	20	No	Yes	6	5	1	5	7	5	1	5	1	1	3	2	1	1	3	Type 5	1-2 times a week	None	Once in 15 days	5-6 times a week	5-6 times a week	1-2 times a week	5-6 times a week	None	None	6	18	6	12	5	47	4	7	5	2	2	4	2	7	3	7
533	Female	156	55	22	Yes	Yes	2	1	1	2	2	2	1	1	1	1	1	1	1	2	2	Type 5	1-2 times a week	None	Once in 15 days	Once in 15 days	3-4 times a week	3-4 times a week	3-4 times a week	None	None	2	6	4	5	4	21	4	7	5	5	3	3	3	7	3	7
534	Female	164	63	20	No	No	7	6	7	7	2	7	7	6	7	1	7	5	1	6	6	Type 5	1-2 times a week	None	Once a month	None	3-4 times a week	Once in 15 days	3-4 times a week	None	None	13	16	18	27	8	82	4	7	6	7	3	5	3	7	3	7
535	Female	168	56	20	Yes	Yes	2	2	1	3	4	3	3	1	1	2	2	3	2	5	3	Type 5	5-6 times a week	None	Once a month	5-6 times a week	Once in 15 days	Once in 15 days	3-4 times a week	None	None	3	9	10	8	7	37	2	7	6	2	5	5	3	7	3	7
536	Female	168	53	22	No	Yes	2	3	2	2	1	6	5	4	6	6	7	7	1	4	2	Type 7	1-2 times a week	Once in 15 days	Once a month	Once in 15 days	Once in 15 days	1-2 times a week	1-2 times a week	None	None	5	5	18	21	9	58	4	5	6	5	5	4	4	7	3	7
537	Female	165	62	25	Yes	Yes	2	1	1	2	2	1	2	2	2	1	2	1	1	2	2	Type 5	3-4 times a week	3-4 times a week	Once in 15 days	3-4 times a week	5-6 times a week	Once in 15 days	1-2 times a week	None	None	2	6	5	7	4	24	3	3	5	3	2	5	4	7	3	7
538	Female	168	67	21	No	No	2	1	1	1	3	3	3	3	1	2	2	2	2	2	2	Type 5	3-4 times a week	Once a month	1-2 times a week	5-6 times a week	Once in 15 days	Once in 15 days	Once in 15 days	None	None	2	6	6	10	6	30	3	6	4	2	5	5	5	7	3	7
539	Female	165	49	20	Yes	Yes	6	7	7	5	6	5	5	5	5	2	1	1	1	1	1	Type 5	5-6 times a week	None	Once in 15 days	Once in 15 days	Once in 15 days	Once in 15 days	Once in 15 days	None	None	14	17	3	20	4	58	2	7	5	5	5	5	5	7	3	7
540	Female	160	55	21	No	No	1	2	2	2	1	1	1	2	1	2	1	1	2	2	2	Type 5	Once in 15 days	None	1-2 times a week	Once in 15 days	3-4 times a week	None	Once in 15 days	None	None	4	4	4	5	6	23	5	7	4	5	3	7	5	7	3	7
541	Female	171	67	20	Yes	Yes	5	7	7	5	7	7	7	7	7	7	1	7	7	7	6	Type 5	Once a month	None	None	1-2 times a week	1-2 times a week	Once in 15 days	Once a month	None	None	14	17	15	28	20	94	6	7	7	4	4	5	6	7	3	7
542	Male	180	95	23	No	No	1	7	3	2	3	3	7	4	3	2	2	1	1	2	2	Type 5	1-2 times a week	1-2 times a week	1-2 times a week	1-2 times a week	3-4 times a week	1-2 times a week	None	None	None	10	6	5	17	5	43	4	4	4	4	3	4	7	7	3	7
543	Female	169	60	18	No	No	7	4	4	1	7	7	6	1	7	7	7	7	7	7	7	Type 5	1-2 times a week	None	1-2 times a week	1-2 times a week	3-4 times a week	1-2 times a week	None	None	None	8	15	21	21	21	86	4	7	4	4	3	4	7	7	3	7
544	Female	158	61	22	No	No	3	1	1	1	1	3	3	1	2	1	3	2	1	1	1	Type 5	Once in 15 days	None	None	None	Once in 15 days	None	None	None	None	2	5	6	9	3	25	5	7	7	7	5	7	7	7	3	7
545	Female	170	53	20	No	Yes	1	3	1	2	1	4	1	1	1	1	2	1	1	2	2	Type 5	3-4 times a week	None	Once a month	Once in 15 days	Once a month	None	None	None	None	4	4	5	7	4	24	3	7	6	5	6	7	7	7	3	7
546	Female	161	74	22	No	Yes	7	7	7	7	7	7	7	7	7	7	7	7	5	5	5	Type 5	1-2 times a week	Once a month	Once a month	1-2 times a week	None	None	None	None	None	14	21	19	28	17	99	4	6	6	4	7	7	7	7	3	7
